# Supplementary material for: Rare-earth/zinc heterometallic complexes containing both alkoxy-amino-bis(phenolato) and chiral salen ligands: synthesis and catalytic application for copolymerization of CO2 with cyclohexene oxide
Source: Royal Society of Chemistry journal article supplement (doi:10.1039/c9dt00064j), 2019-01-01
Supplement: c9dt00064j1.pdf [file c9dt00064j1.pdf]

*Supporting Information*

**Rare-earth/zinc heterometallic complexes containing both alkoxy-amino-bis(phenolato) and chiral salen ligands: synthesis and catalytic application for copolymerization of CO<sub>2</sub> with cyclohexene oxide**

Ruoyu Xu, Linyan Hua, Li Xiang, Yingming Yao, Xuebing Leng and Yaofeng Chen

**Contents**

|                                                                                              |     |
|----------------------------------------------------------------------------------------------|-----|
| 1. Molecular structures of Ln-( <i>R,R</i> )Zn (Ln = Y, Dy, La) and Sm-( <i>S,S</i> )Zn..... | S2  |
| 2. NMR spectra of rare-earth/zinc heterometallic complexes.....                              | S6  |
| 3. NMR spectra of the copolymers.....                                                        | S25 |
| 4. End group analysis.....                                                                   | S27 |
| 5. References.....                                                                           | S29 |

**Table S1** Crystallographic Data and Refinement for the complexes.

|                                                         | Y-( <i>R,R</i> )Zn·benzene                                                        | Dy-( <i>R,R</i> )Zn·toluene                                                        | Sm-( <i>R,R</i> )Zn·benzene                                                        |
|---------------------------------------------------------|-----------------------------------------------------------------------------------|------------------------------------------------------------------------------------|------------------------------------------------------------------------------------|
| formula                                                 | C <sub>65</sub> H <sub>95</sub> N <sub>4</sub> O <sub>5</sub> Si <sub>2</sub> YZn | C <sub>66</sub> H <sub>97</sub> N <sub>4</sub> O <sub>5</sub> Si <sub>2</sub> DyZn | C <sub>65</sub> H <sub>95</sub> N <sub>4</sub> O <sub>5</sub> Si <sub>2</sub> SmZn |
| fw                                                      | 1222.90                                                                           | 1310.52                                                                            | 1284.34                                                                            |
| color                                                   | colorless                                                                         | colorless                                                                          | colorless                                                                          |
| cryst syst.                                             | monoclinic                                                                        | monoclinic                                                                         | monoclinic                                                                         |
| space group                                             | <i>P</i> 2 <sub>1</sub>                                                           | <i>P</i> 2 <sub>1</sub>                                                            | <i>P</i> 2 <sub>1</sub>                                                            |
| <i>a</i> , Å                                            | 10.3789(3)                                                                        | 10.4278(2)                                                                         | 10.3709(2)                                                                         |
| <i>b</i> , Å                                            | 25.7640(7)                                                                        | 25.8777(4)                                                                         | 26.0470(5)                                                                         |
| <i>c</i> , Å                                            | 15.3261(4)                                                                        | 15.2743(2)                                                                         | 15.2688(3)                                                                         |
| <i>α</i> , deg                                          | 90                                                                                | 90                                                                                 | 90                                                                                 |
| <i>β</i> , deg                                          | 108.3420(10)                                                                      | 108.6460(8)                                                                        | 108.6854(10)                                                                       |
| <i>γ</i> , deg                                          | 90                                                                                | 90                                                                                 | 90                                                                                 |
| <i>V</i> , Å <sup>3</sup>                               | 3890.02(19)                                                                       | 3905.39(11)                                                                        | 3907.18(13)                                                                        |
| <i>Z</i>                                                | 2                                                                                 | 2                                                                                  | 2                                                                                  |
| <i>D</i> <sub>calcd</sub> , (mg/m <sup>3</sup> )        | 1.044                                                                             | 1.114                                                                              | 1.092                                                                              |
| <i>F</i> (000)                                          | 1300                                                                              | 1370                                                                               | 1346                                                                               |
| <i>T</i> (K)                                            | 170                                                                               | 170                                                                                | 170                                                                                |
| <i>θ</i> range, deg                                     | 2.984, 54.926                                                                     | 5.318, 54.948                                                                      | 3.915, 54.889                                                                      |
| no. of refs collected                                   | 41757                                                                             | 38609                                                                              | 40043                                                                              |
| no. of unique refs                                      | 14566                                                                             | 13053                                                                              | 10719                                                                              |
| no. of obsd refs<br>( <i>I</i> > 2σ( <i>I</i> ))        | 11687                                                                             | 12128                                                                              | 10068                                                                              |
| No. of params                                           | 723                                                                               | 721                                                                                | 711                                                                                |
| Final R, R <sub>w</sub> ( <i>I</i> ><br>2σ( <i>I</i> )) | 0.0557, 0.1305                                                                    | 0.0620, 0.1772                                                                     | 0.0412, 0.1043                                                                     |
| Goodness-of-fit on <i>F</i> <sup>2</sup>                | 1.008                                                                             | 1.055                                                                              | 1.027                                                                              |
| Δρ <sub>max, min</sub> , eÅ <sup>-3</sup>               | 0.655, -1.007                                                                     | 1.163, -0.840                                                                      | 0.855, -1.080                                                                      |

|                                                                     | La-( <i>R,R</i> )Zn·toluene                                                        | Sm-( <i>S,S</i> )Zn·toluene                                                        |
|---------------------------------------------------------------------|------------------------------------------------------------------------------------|------------------------------------------------------------------------------------|
| formula                                                             | C <sub>66</sub> H <sub>97</sub> N <sub>4</sub> O <sub>5</sub> Si <sub>2</sub> LaZn | C <sub>66</sub> H <sub>97</sub> N <sub>4</sub> O <sub>5</sub> Si <sub>2</sub> SmZn |
| fw                                                                  | 1286.93                                                                            | 1298.37                                                                            |
| color                                                               | colorless                                                                          | colorless                                                                          |
| cryst syst.                                                         | monoclinic                                                                         | monoclinic                                                                         |
| space group                                                         | <i>P</i> 2 <sub>1</sub>                                                            | <i>P</i> 2 <sub>1</sub>                                                            |
| <i>a</i> , Å                                                        | 10.3888(2)                                                                         | 10.3825(2)                                                                         |
| <i>b</i> , Å                                                        | 26.3263(5)                                                                         | 26.0638(5)                                                                         |
| <i>c</i> , Å                                                        | 15.2186(3)                                                                         | 15.2519(3)                                                                         |
| <i>α</i> , deg                                                      | 90                                                                                 | 90                                                                                 |
| <i>β</i> , deg                                                      | 108.8760(10)                                                                       | 108.7512(9)                                                                        |
| <i>γ</i> , deg                                                      | 90                                                                                 | 90                                                                                 |
| <i>V</i> , Å <sup>3</sup>                                           | 3938.42(13)                                                                        | 3908.21(13)                                                                        |
| <i>Z</i>                                                            | 2                                                                                  | 2                                                                                  |
| <i>D</i> <sub>calcd</sub> , (mg/m <sup>3</sup> )                    | 1.085                                                                              | 1.103                                                                              |
| <i>F</i> (000)                                                      | 1352                                                                               | 1362                                                                               |
| <i>T</i> (K)                                                        | 170                                                                                | 173                                                                                |
| <i>θ</i> range, deg                                                 | 3.960, 54.930                                                                      | 3.962, 55.011                                                                      |
| no. of refns collected                                              | 38434                                                                              | 39799                                                                              |
| no. of unique refns                                                 | 12711                                                                              | 12221                                                                              |
| no. of obsd refns<br>( <i>I</i> > 2σ( <i>I</i> ))                   | 12348                                                                              | 11980                                                                              |
| No. of params                                                       | 733                                                                                | 721                                                                                |
| Final <i>R</i> , <i>R</i> <sub>w</sub> ( <i>I</i> > 2σ( <i>I</i> )) | 0.0565, 0.1501                                                                     | 0.0356, 0.0959                                                                     |
| Goodness-of-fit on <i>F</i> <sup>2</sup>                            | 1.026                                                                              | 1.030                                                                              |
| Δρ <sub>max, min</sub> , eÅ <sup>-3</sup>                           | 1.110, -0.756                                                                      | 0.969, -0.461                                                                      |

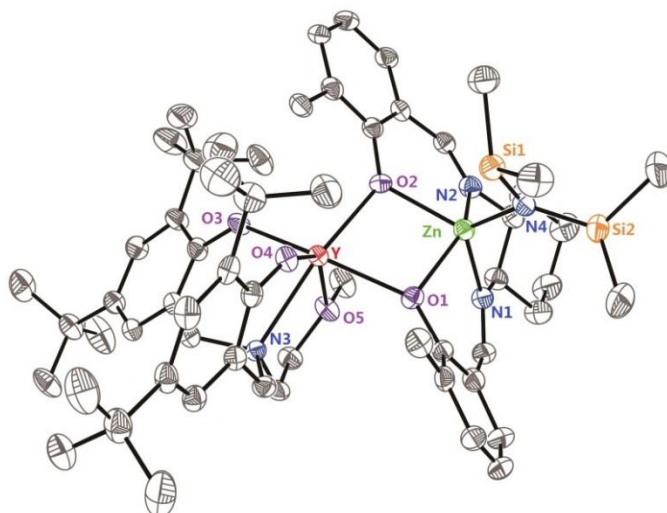

**Figure S1.** Molecular structure of complex Y-(*R,R*)Zn with thermal ellipsoids at the 30% probability level. Hydrogen atoms of the complex and benzene molecule in the lattice were omitted for clarity. Selected distances [Å] and angles [°]: Y–O1 2.262(4), Y–O2 2.273(4), Y–O3 2.151(4), Y–O4 2.131(4), Y–O5 2.446(4), Y–N3 2.485(5), Zn–O1 2.163(4), Zn–O2 2.135(4), Zn–N1 2.109(5), Zn–N2 2.094(6), Zn–N4 1.932(6), Y···Zn 3.413(1); O1–Y–O2 75.9(2), O1–Zn–O2 80.9(2), Zn1–O–Y1 100.9(2), Zn–O2–Y 101.1(2), O3–Y–O4 100.7(2), O4–Y–O5 146.1(2)°.

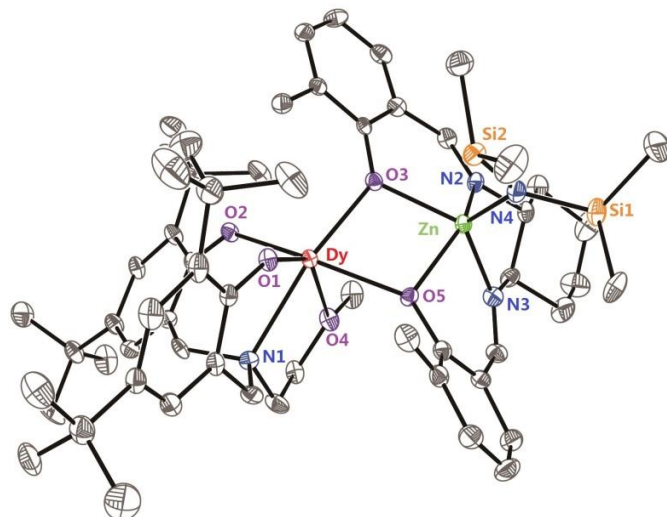

**Figure S2.** Molecular structure of complex Dy-(*R,R*)Zn with thermal ellipsoids at the 30% probability level. Hydrogen atoms of the complex and toluene molecule in the lattice were omitted for clarity. Selected distances [Å] and angles [°]: Dy–O1 2.148(7), Dy–O2 2.157(7), Dy–O3 2.293(7), Dy–O5 2.266(7), Dy–O4 2.467(8), Dy–N1 2.499(9), Zn–O3 2.125(7), Zn–O5 2.169(7), Zn–N2 2.107(10), Zn–N3 2.101(10), Zn–N4 1.932(10), Dy···Zn 3.419(2); O3–Dy–O5 75.8(2), O3–Zn–O5 81.4(3), Zn–O3–Dy 101.4(3), Zn–O5–Dy 100.8(3), O–Dy–O 100.8(3), O–Dy–O 145.0(3)°.

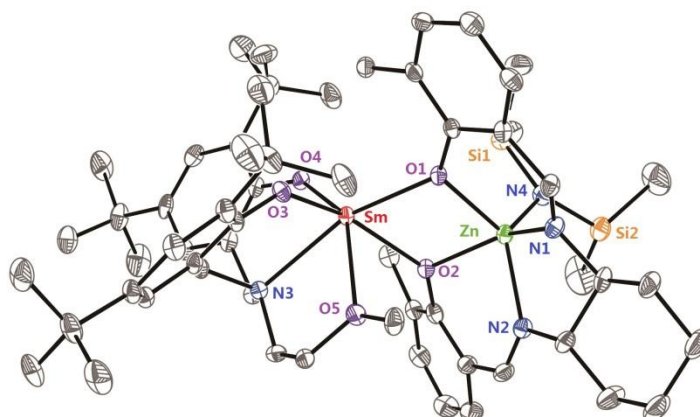

**Figure S3.** Molecular structure of complex Sm-(*S,S*)Zn with thermal ellipsoids at the 30% probability level. Hydrogen atoms of the complex and toluene molecule in the lattice were omitted for clarity. Selected distances [Å] and angles [°]: Sm–O1 2.348(4), Sm–O2 2.369(4), Sm–O3 2.199(4), Sm–O4 2.149(4), Sm–O5 2.537(4), Sm–N3 2.560(5), Zn–O1 2.154(4), Zn–O2 2.124(4), Zn–N1 2.107(5), Zn–N2 2.115(5), Zn–N4 1.943(6), Sm···Zn 3.487(1); O1–Sm–O2 73.6(1), O1–Zn–O2 82.7(1), Zn–O1–Sm 101.5(2), Zn–O2–Sm 101.8(2), O3–Sm–O4 102.2(2), O4–Sm–O5 142.7(2)°.

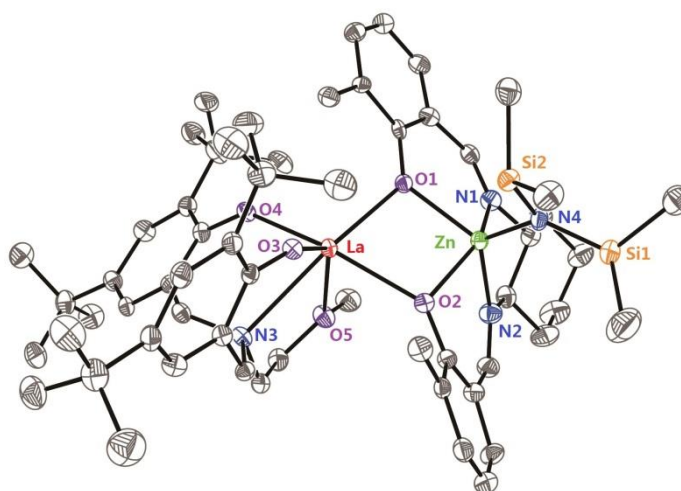

**Figure S4.** Molecular structure of complex La-(*R,R*)Zn with thermal ellipsoids at the 30% probability level. Hydrogen atoms of the complex and toluene molecule in the lattice were omitted for clarity. Selected distances [Å] and angles [°]: La–O1 2.440(6), La–O2 2.404(6), La–O3 2.252(6), La–O4 2.286(6), La–O5 2.595(7), La–N3 2.703(7), Zn–O1 2.121(6), Zn–O2 2.155(6), Zn–N1 2.109(8), Zn–N2 2.116(9), Zn–N4 1.952(8), La···Zn 3.530(1); O1–La–O2 72.8(2), O1–Zn–O2 84.5(2), Zn–O1–La 101.2(2), Zn–O2–La 101.3(2), O3–La–O4 100.2(2), O3–La–O5 137.0(2)°.

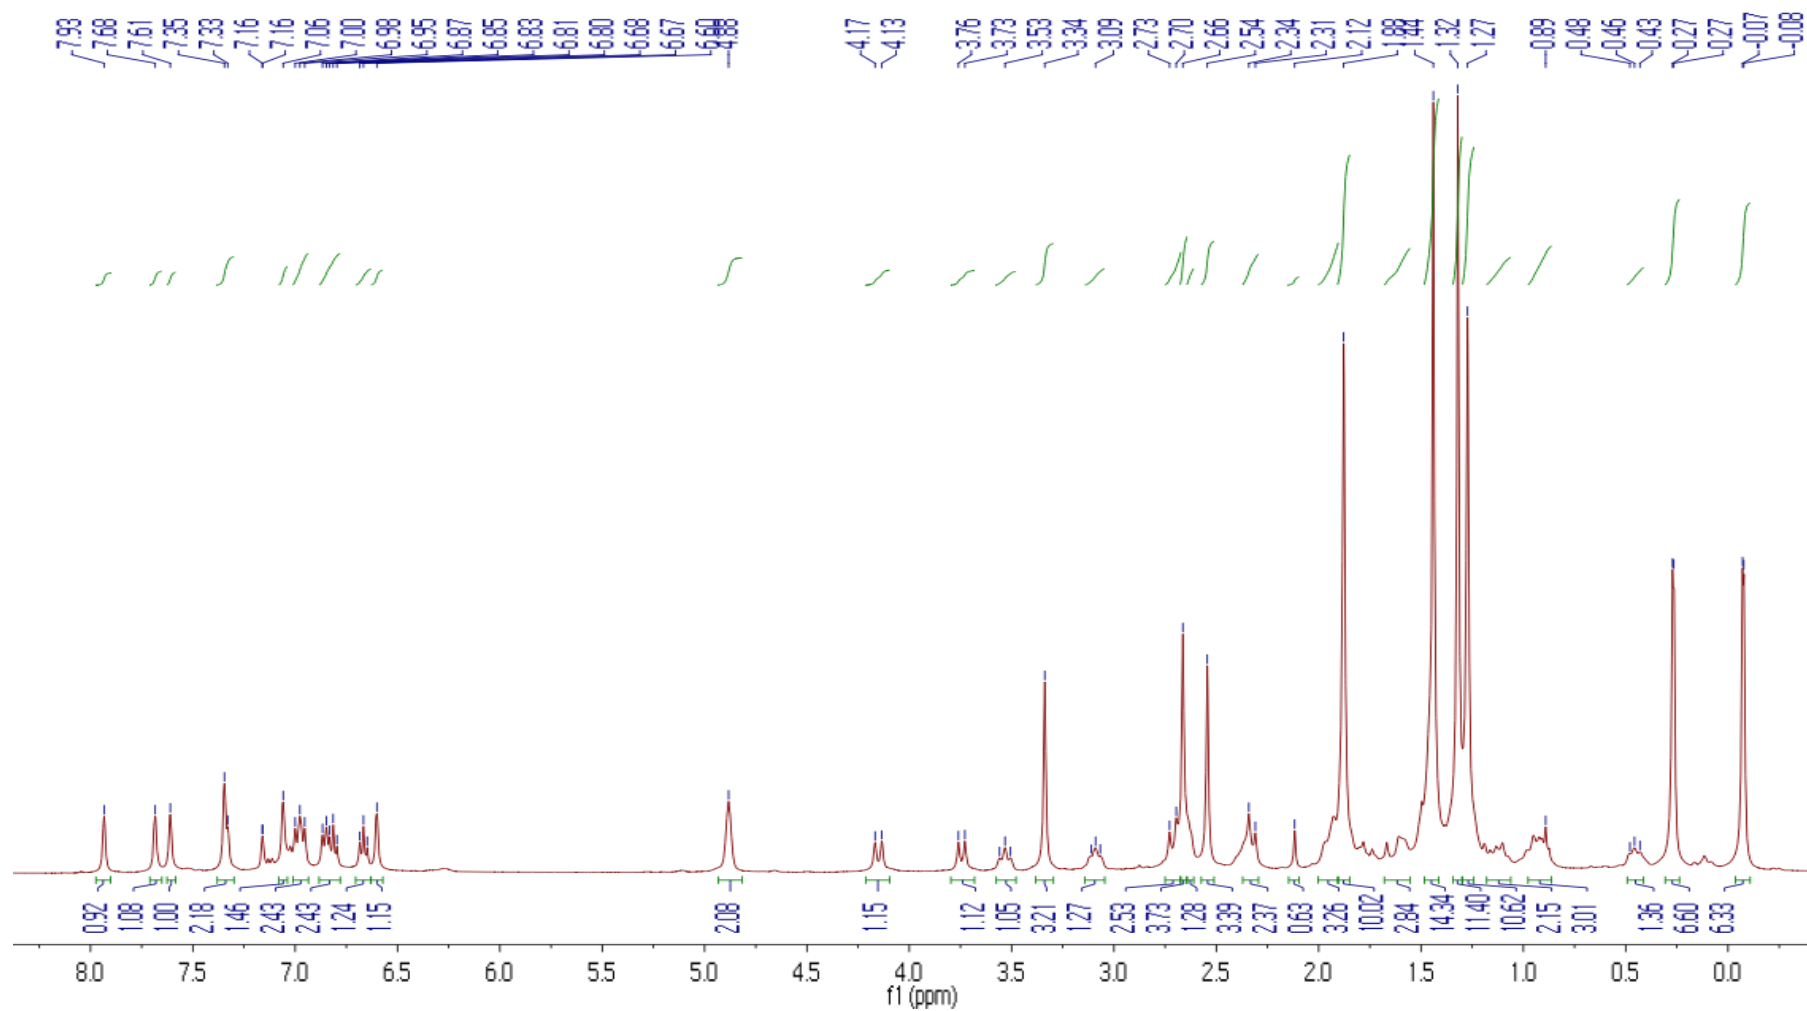

**Figure S5.** <sup>1</sup>H NMR spectrum of Y-(*R,R*)Zn (400 MHz, C<sub>6</sub>D<sub>6</sub>, 25 °C).

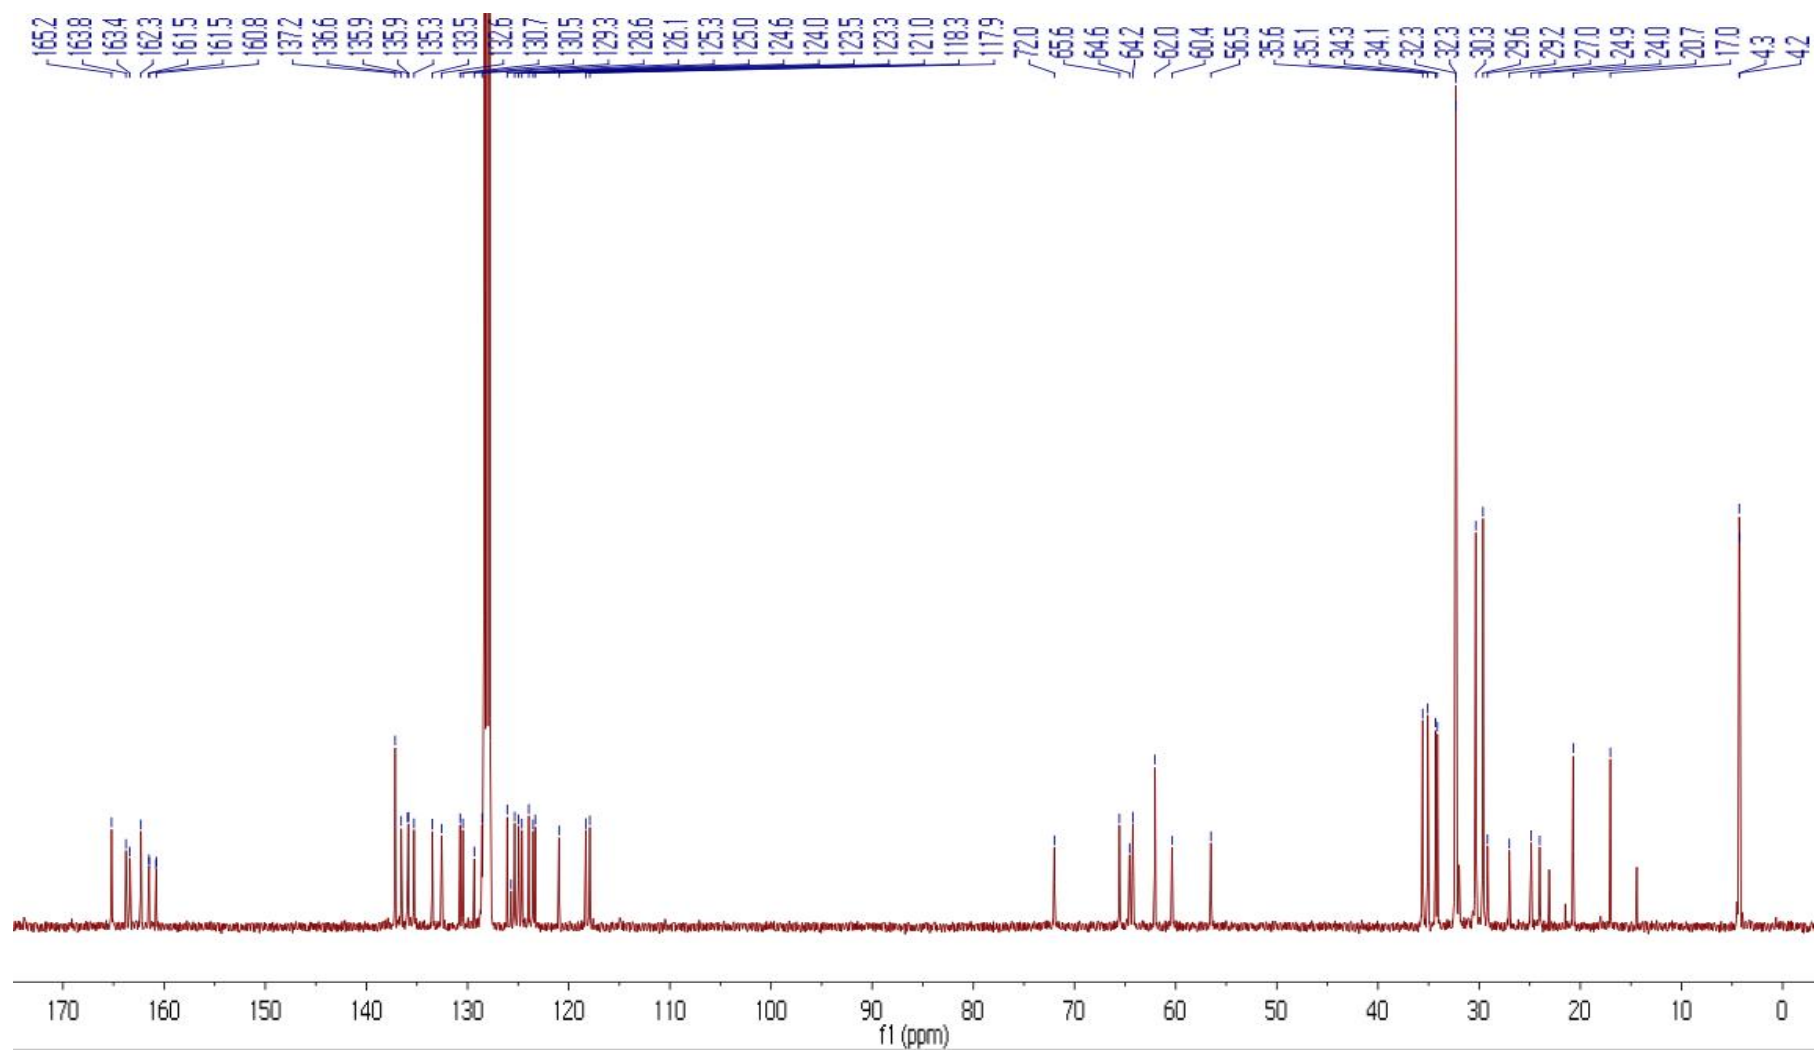

**Figure S6.**  $^{13}\text{C}\{^1\text{H}\}$  NMR spectrum of Y-(*R,R*)Zn (100 MHz,  $\text{C}_6\text{D}_6$ , 25 °C).

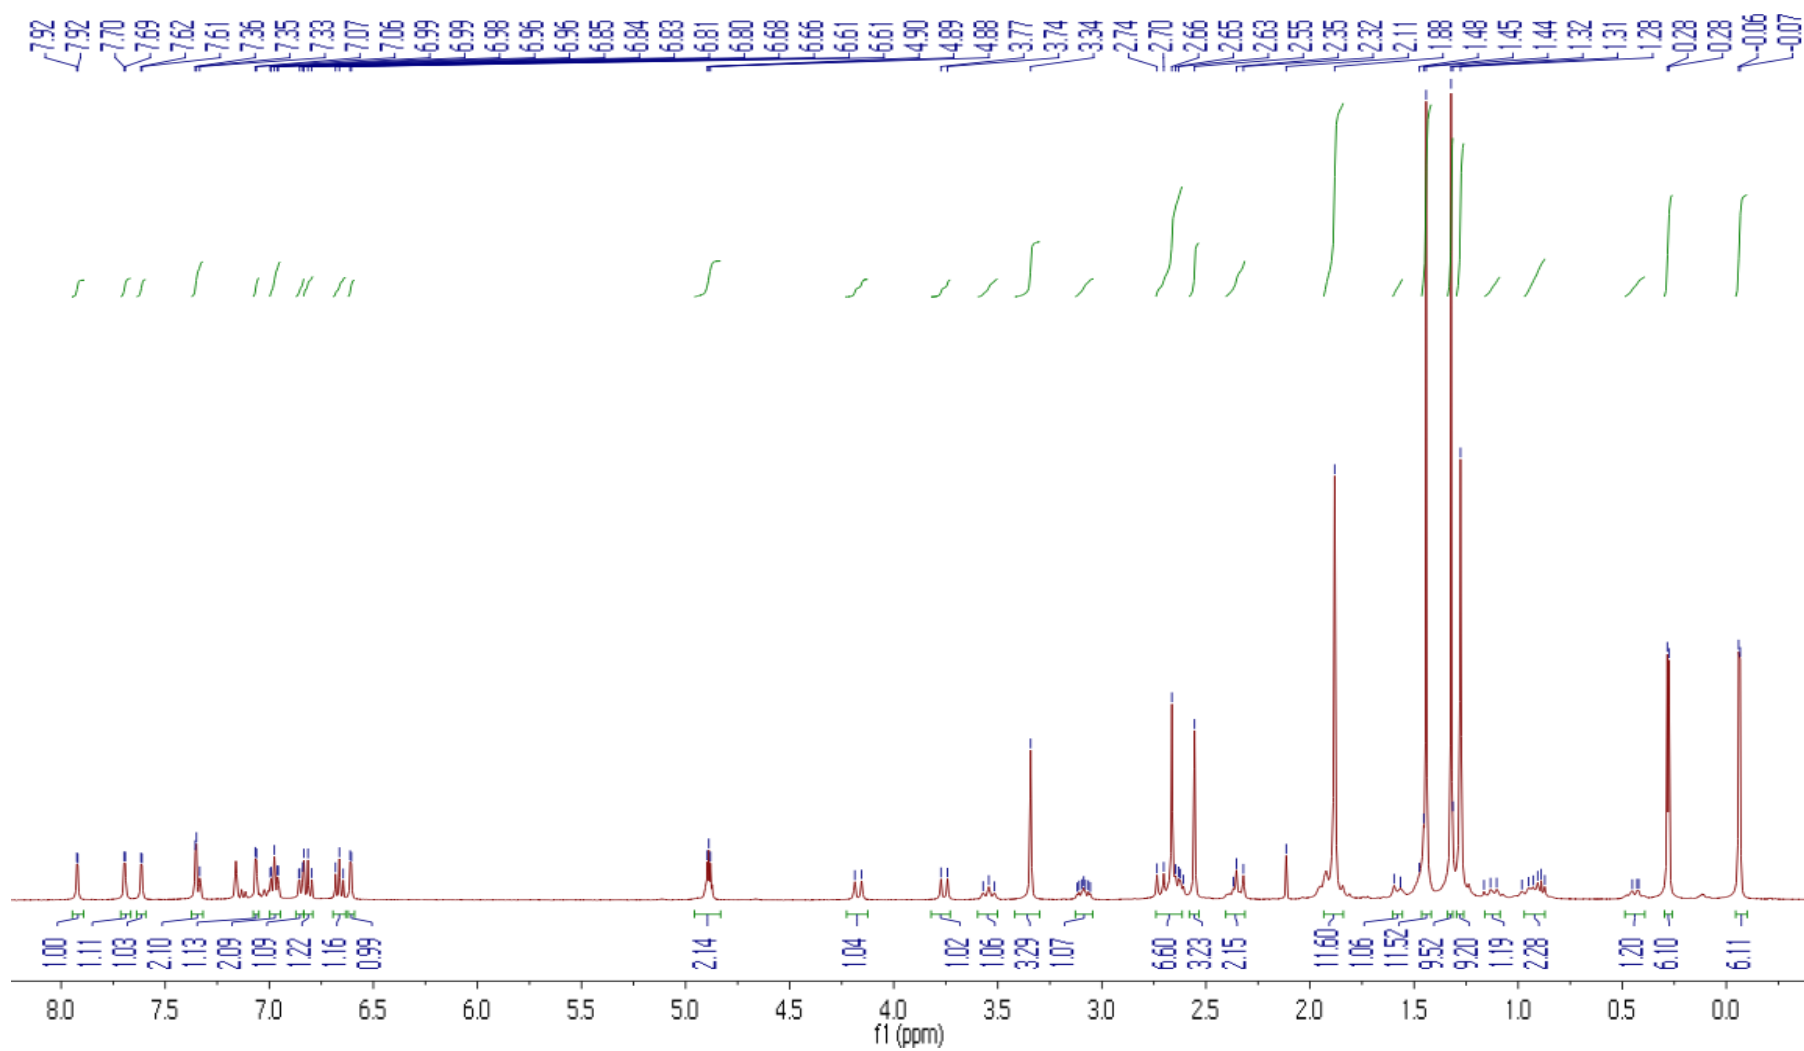

**Figure S7.**  $^1\text{H}$  NMR spectrum of  $\text{Y}-(S,S)\text{Zn}$  (400 MHz,  $\text{C}_6\text{D}_6$ ,  $25\text{ }^\circ\text{C}$ ).



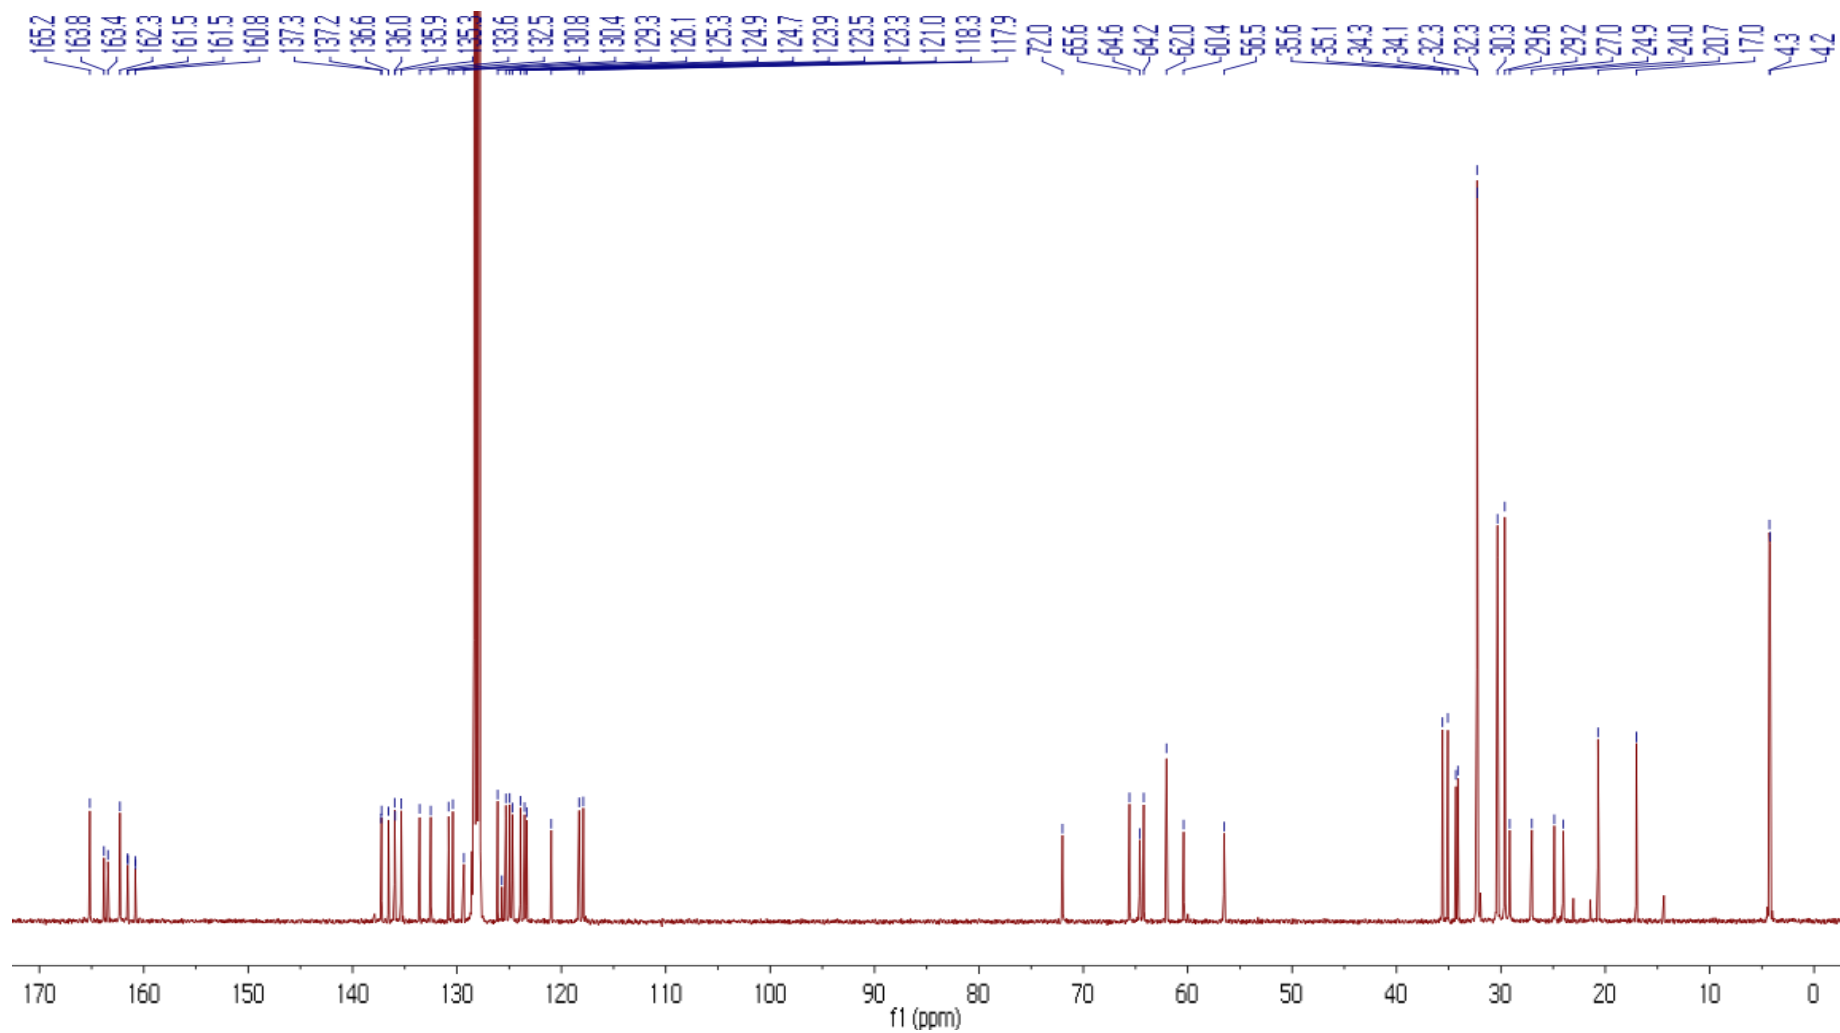

**Figure S8.**  $^{13}\text{C}\{^1\text{H}\}$  NMR spectrum of Y-(*S,S*)Zn (100 MHz,  $\text{C}_6\text{D}_6$ , 25 °C).

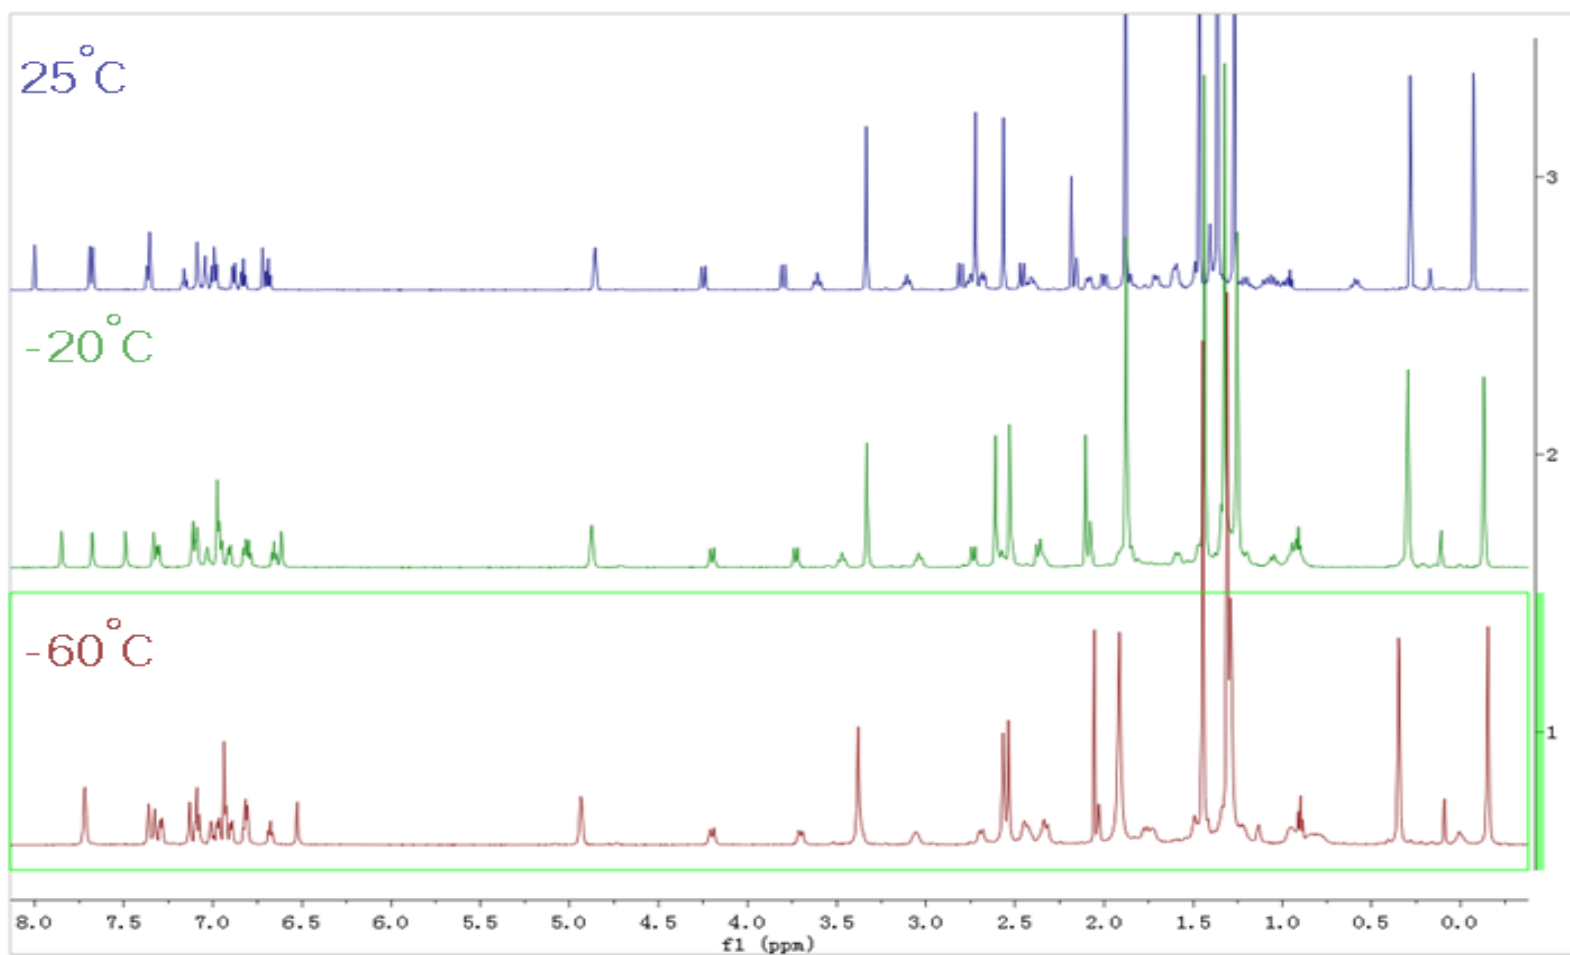

**Figure S9.** Variable temperature <sup>1</sup>H NMR spectra of Y-(*S,S*)Zn (600 MHz, toluene-*d*<sub>8</sub>).

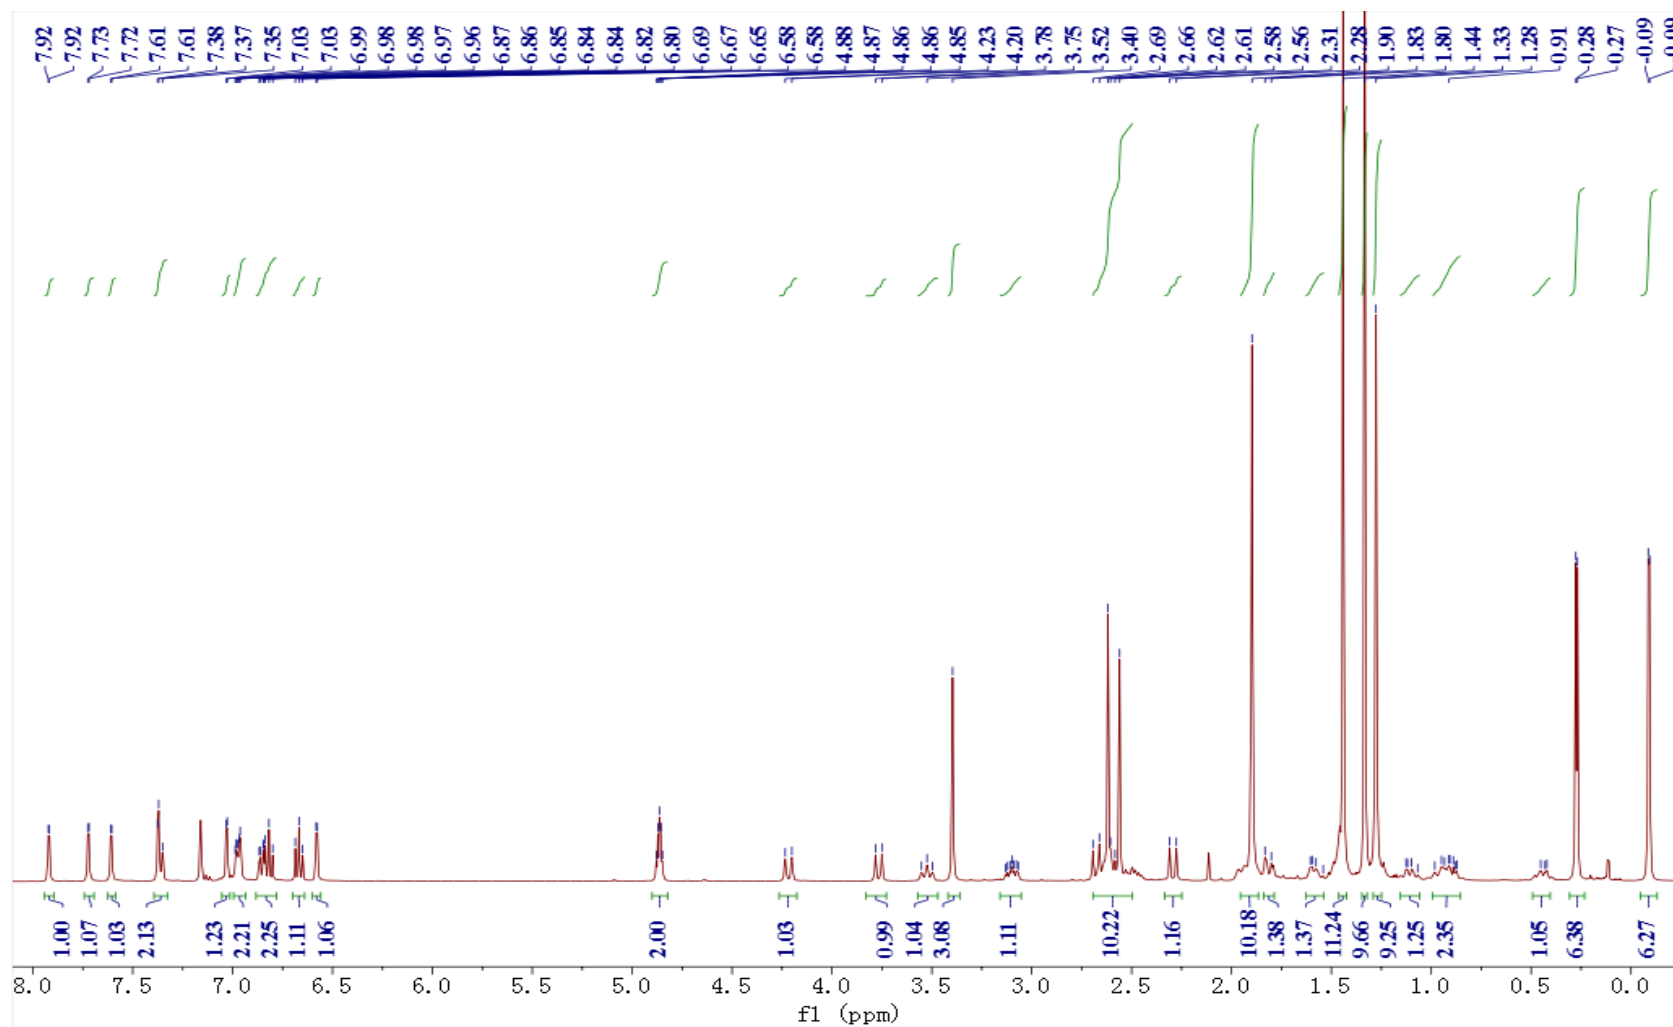

**Figure S10.**  $^1\text{H}$  NMR spectrum of Lu-(*R,R*)Zn (400 MHz,  $\text{C}_6\text{D}_6$ , 25 °C).

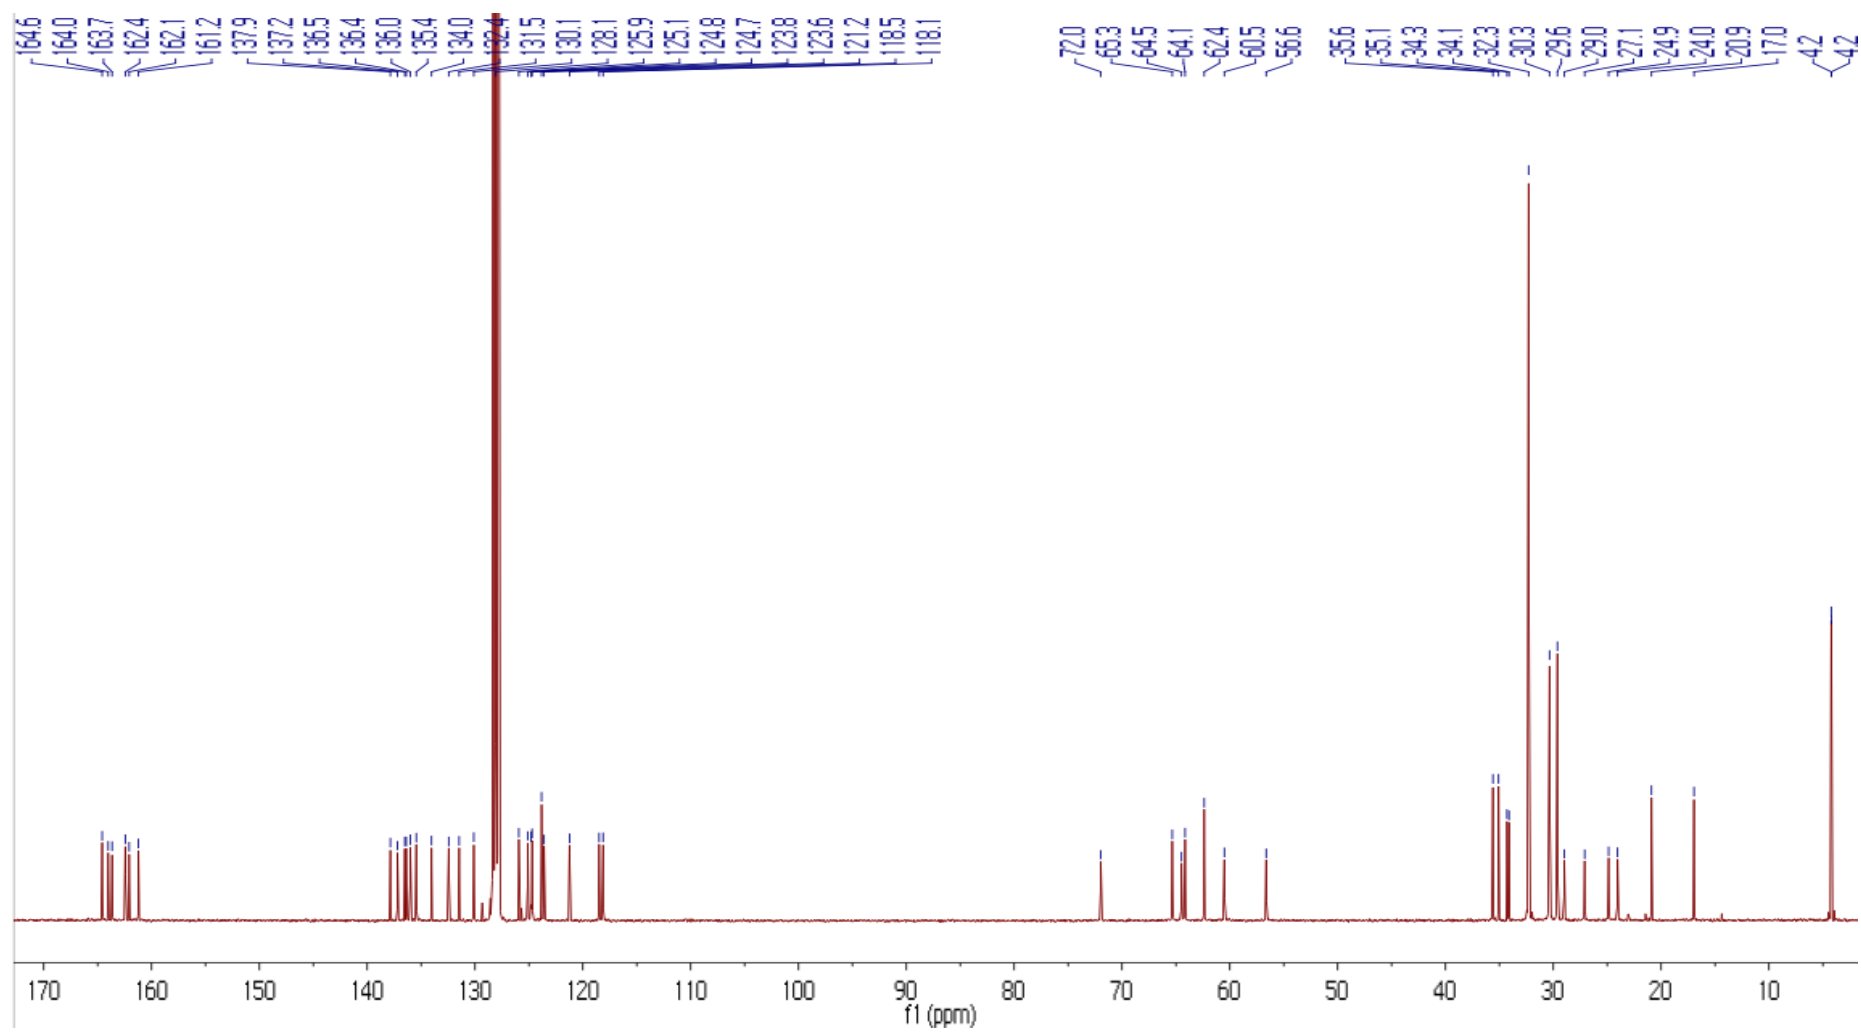

**Figure S11.**  $^{13}\text{C}\{^1\text{H}\}$  NMR spectrum of Lu-(*R,R*)Zn (100 MHz,  $\text{C}_6\text{D}_6$ , 25 °C).

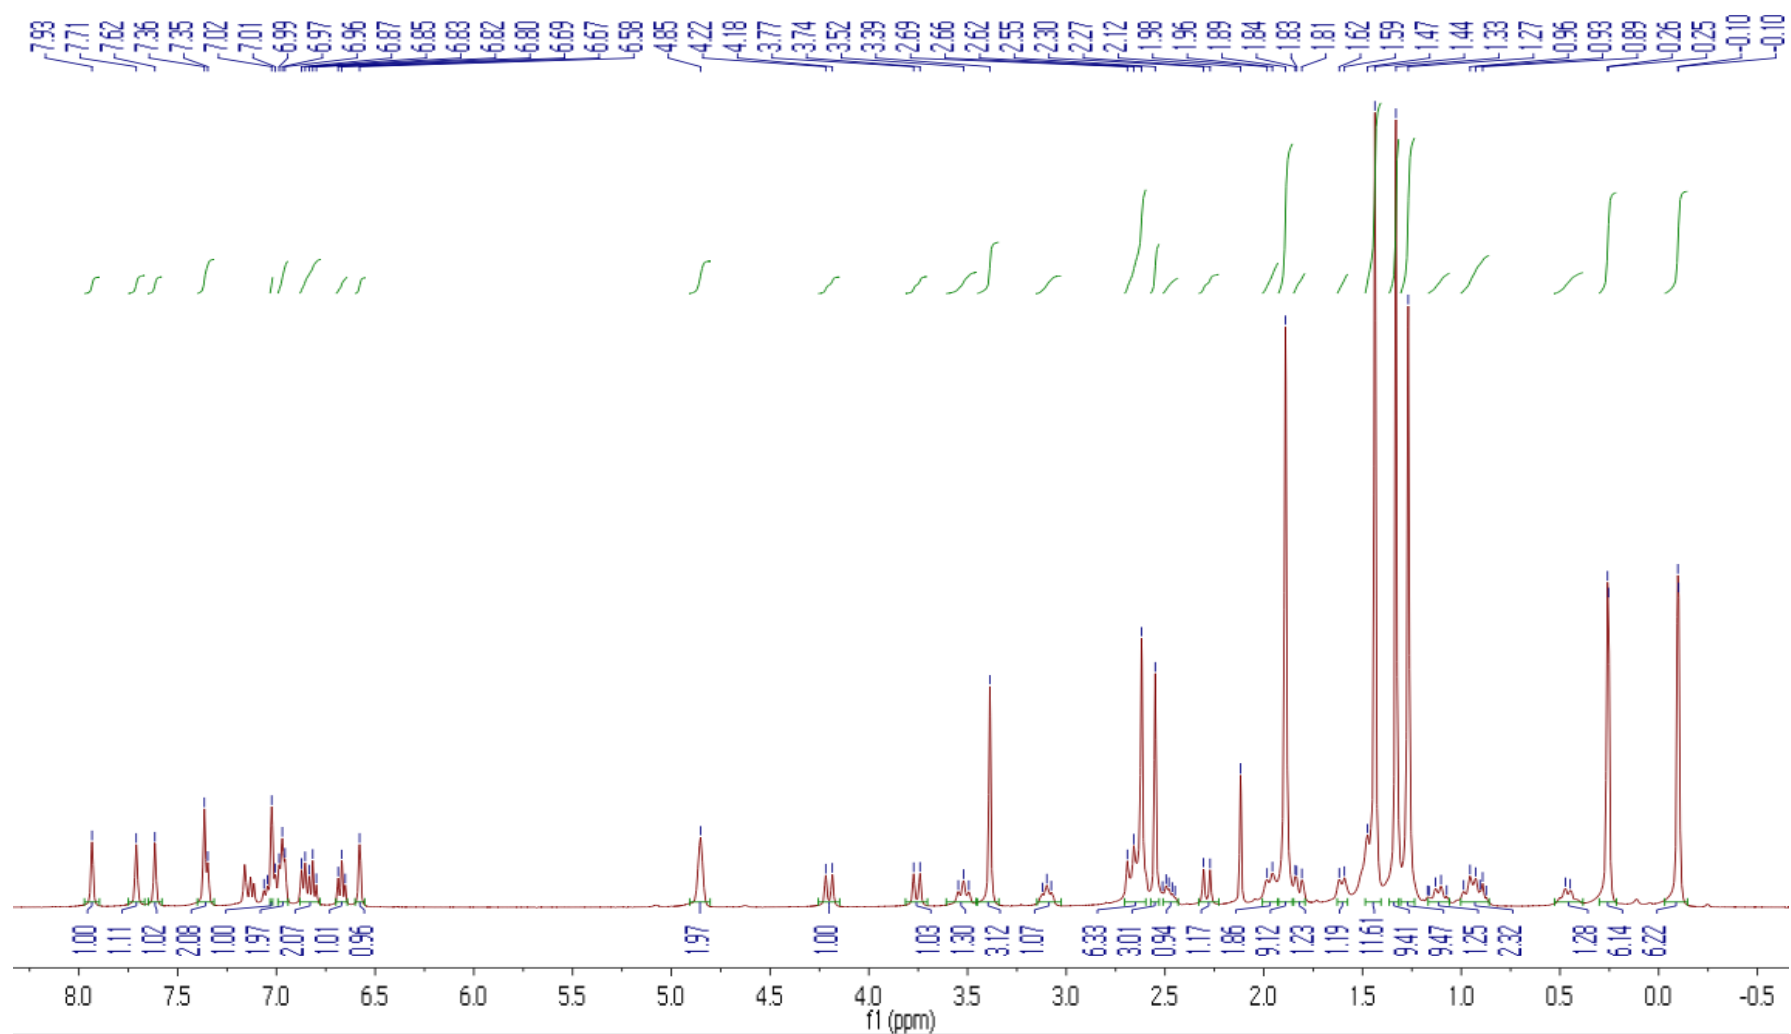

**Figure S12.**  $^1\text{H}$  NMR spectrum of Lu-(*S,S*)Zn (400 MHz,  $\text{C}_6\text{D}_6$ , 25  $^\circ\text{C}$ ).

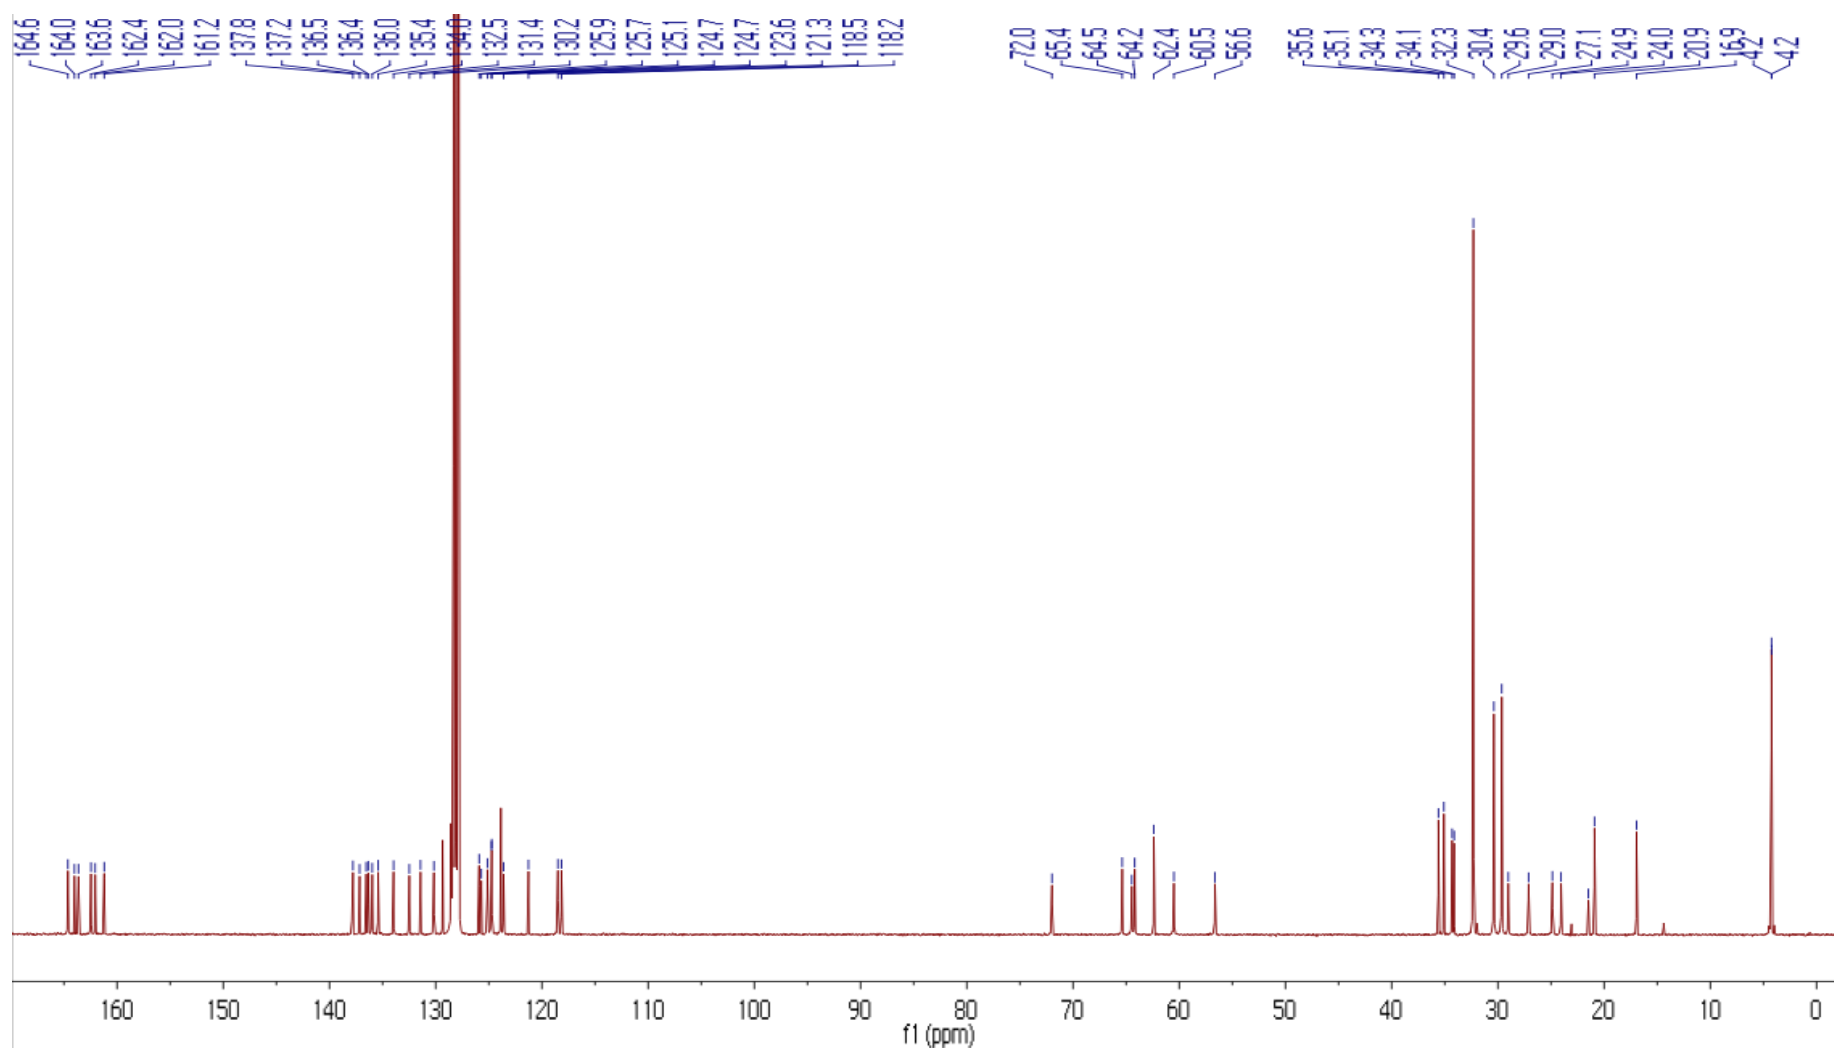

**Figure S13.**  $^{13}\text{C}\{^1\text{H}\}$  NMR spectrum of Lu-(*S,S*)Zn (100 MHz,  $\text{C}_6\text{D}_6$ , 25 °C).

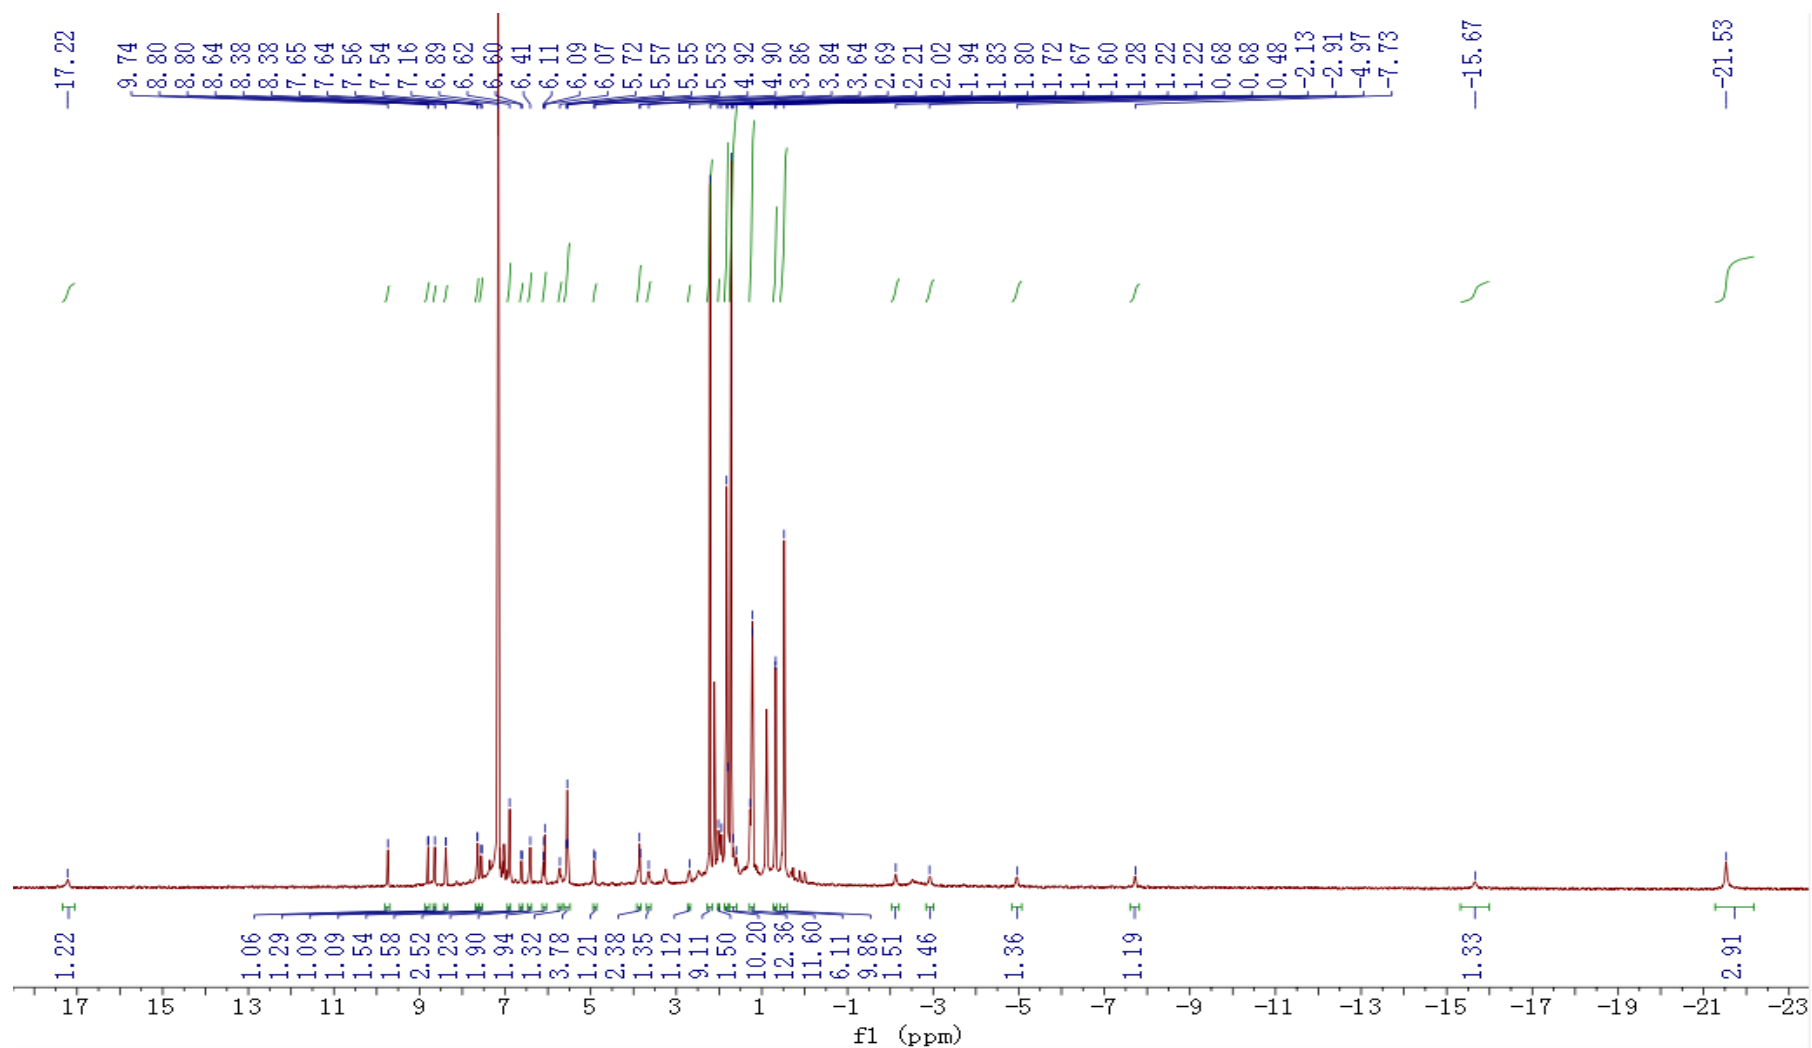

**Figure S14.**  $^1\text{H}$  NMR spectrum of Sm-(*R,R*)Zn (400 MHz,  $\text{C}_6\text{D}_6$ , 25 °C).

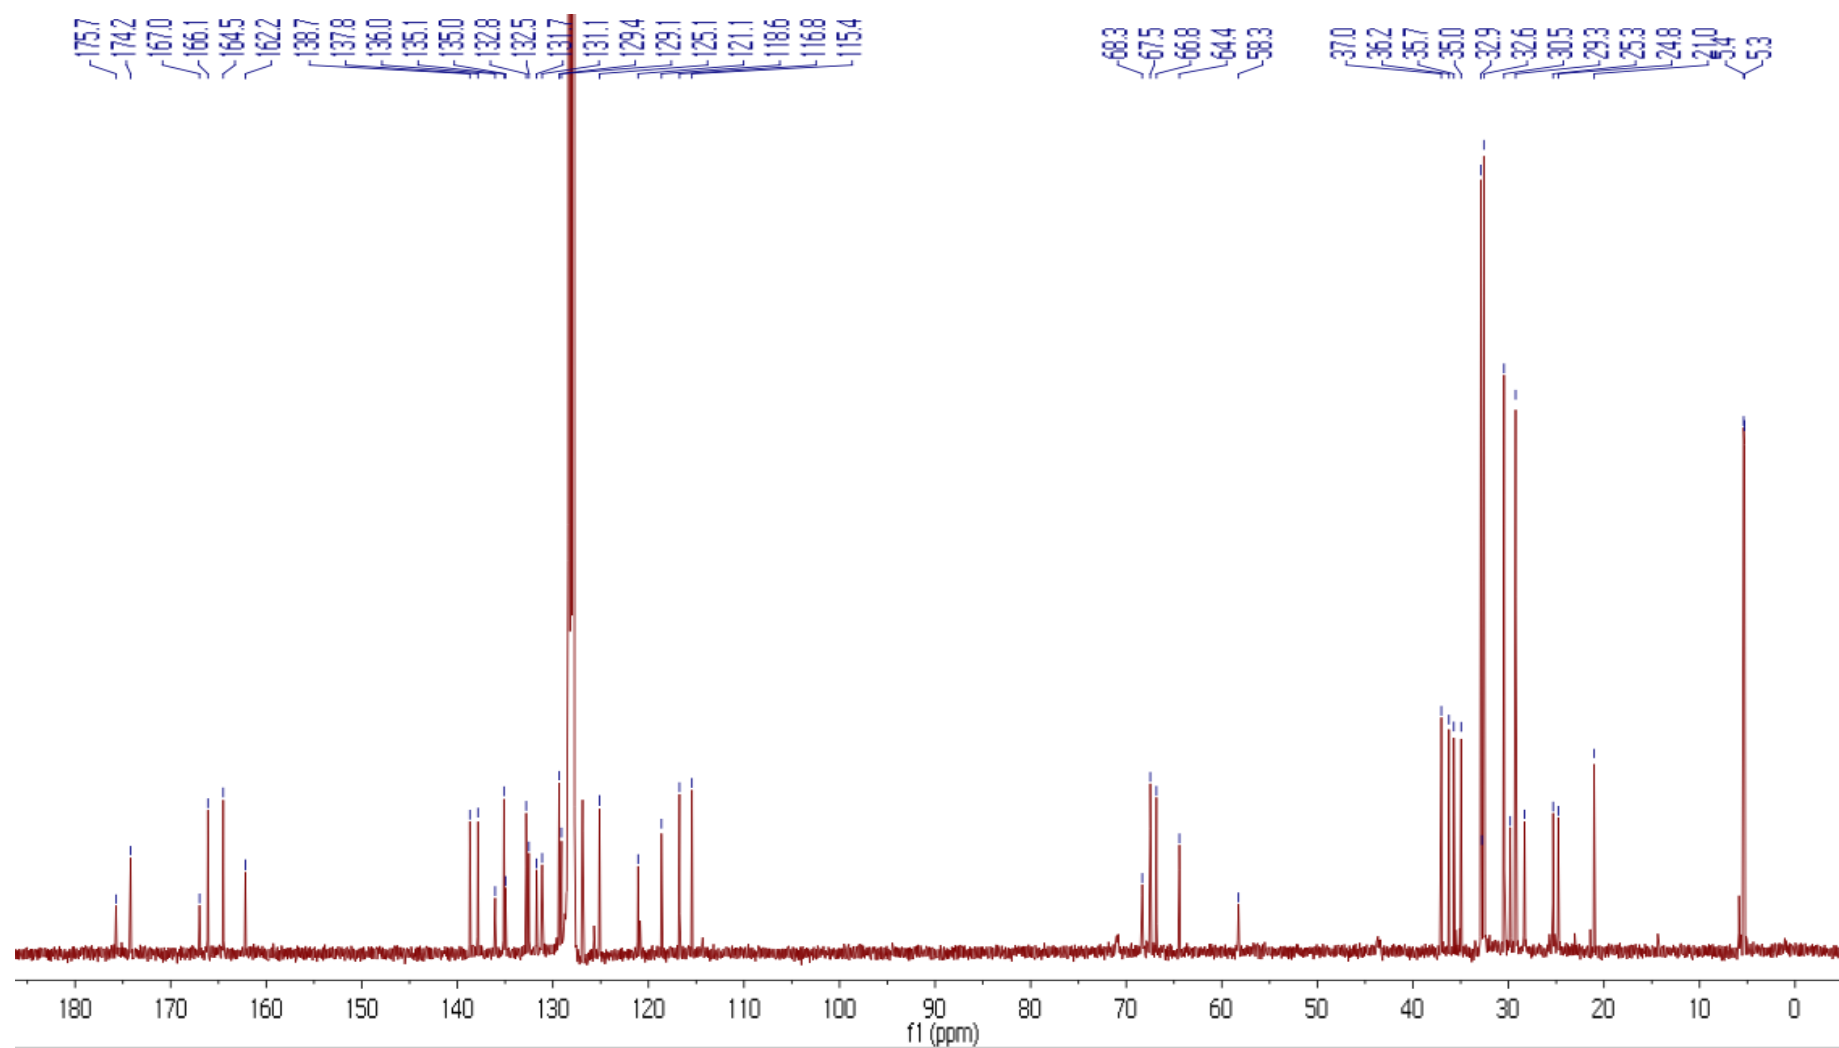

**Figure S15.**  $^{13}\text{C}\{^1\text{H}\}$  NMR spectrum of  $\text{Sm}-(R,R)\text{Zn}$  (100 MHz,  $\text{C}_6\text{D}_6$ ,  $25\text{ }^\circ\text{C}$ ).



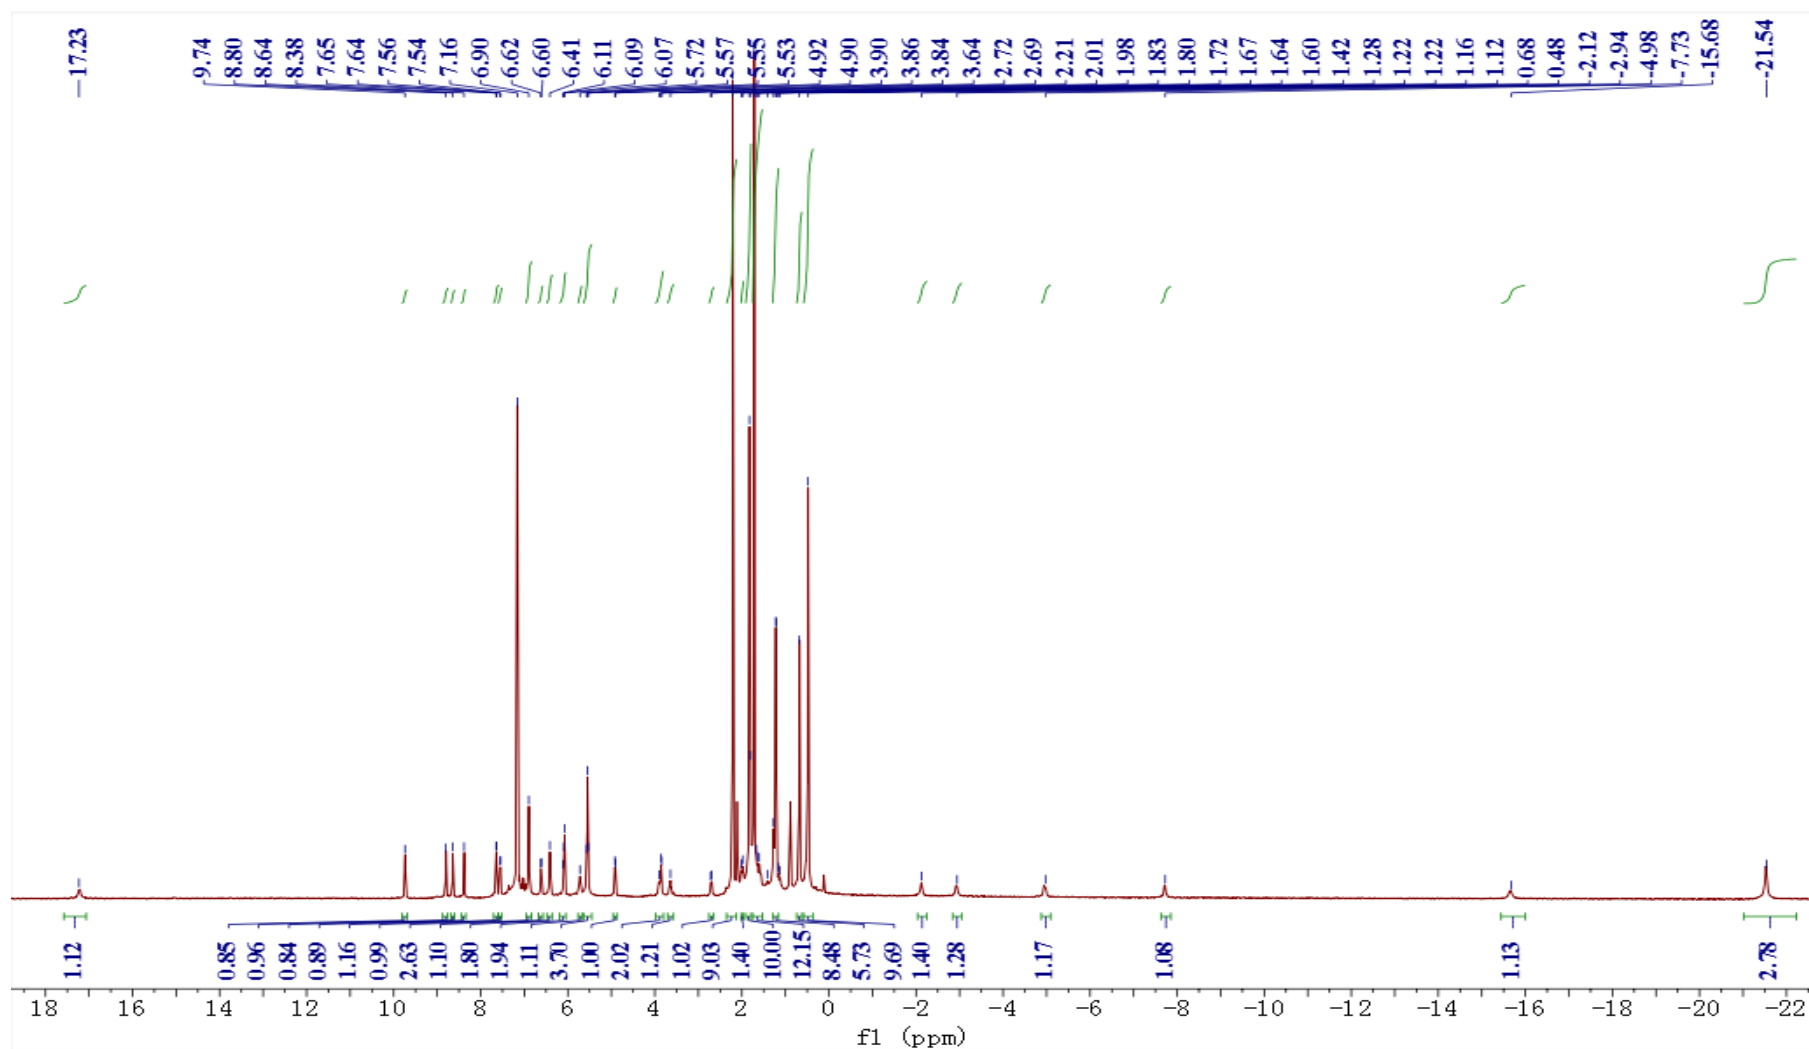

**Figure S16.** <sup>1</sup>H NMR spectrum of Sm-(*S,S*)Zn (400 MHz, C<sub>6</sub>D<sub>6</sub>, 25 °C).

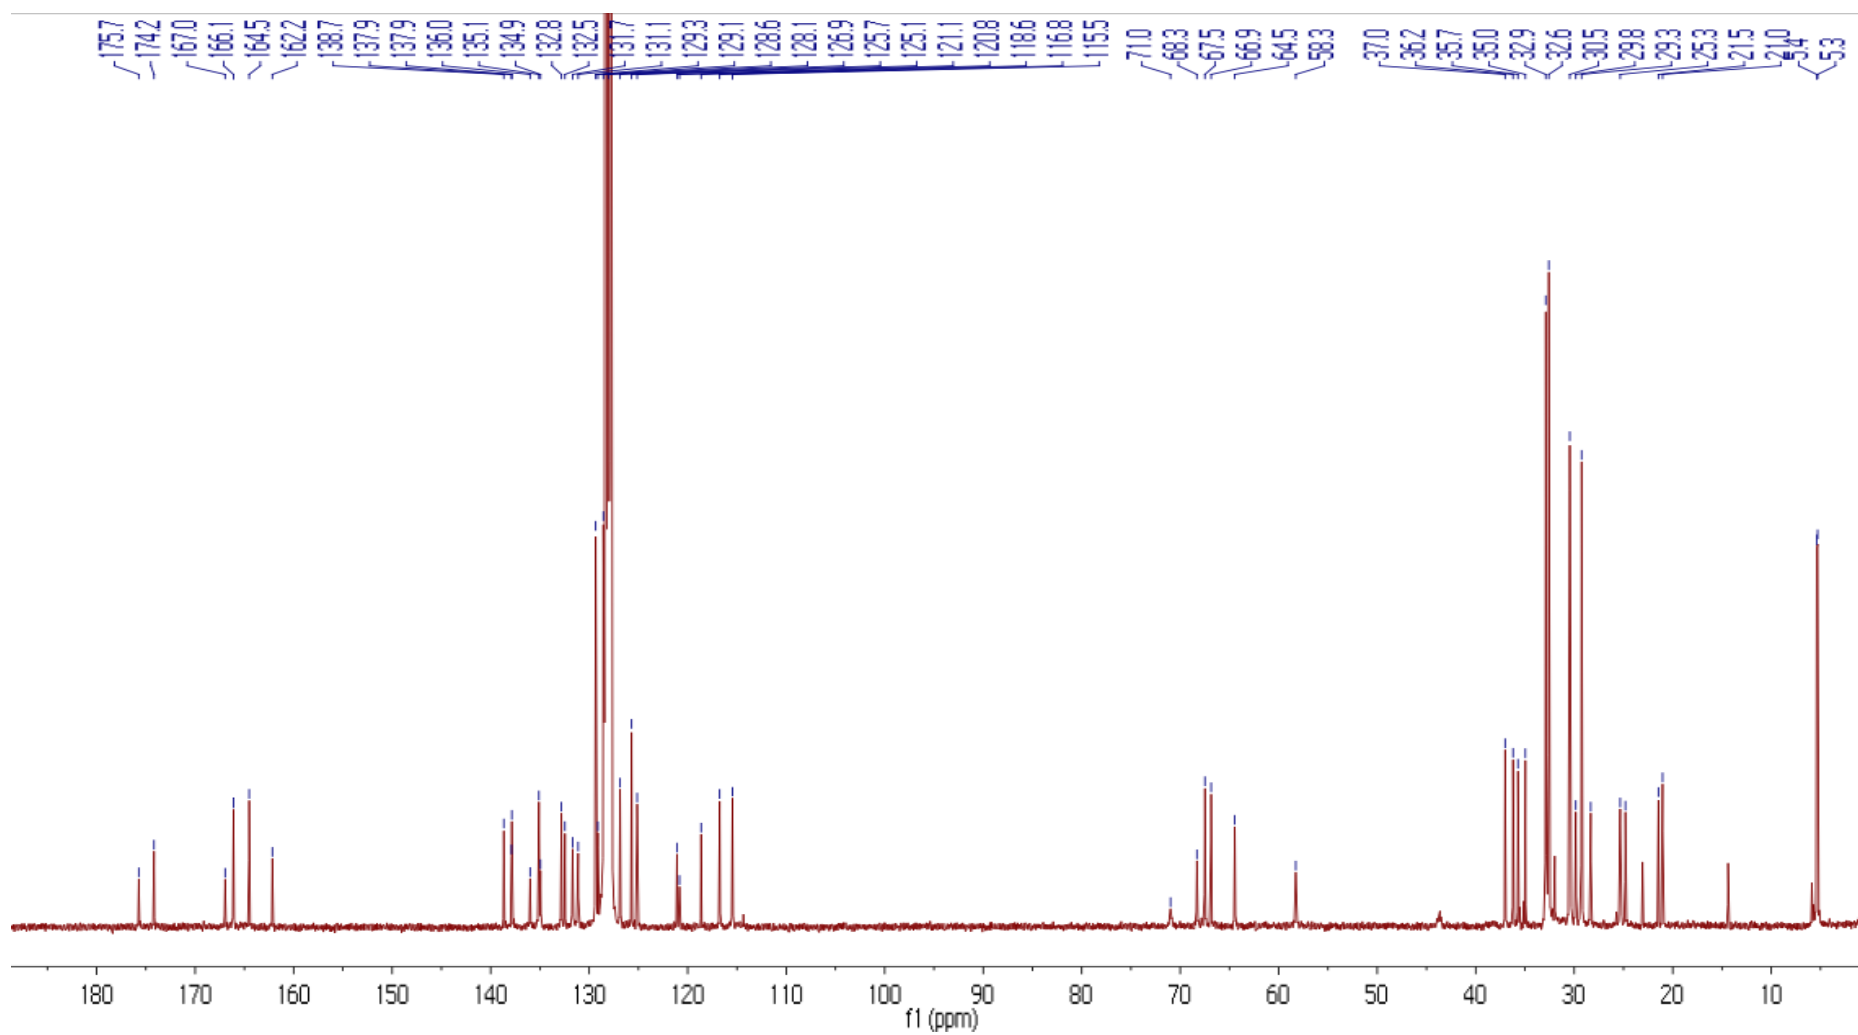

**Figure S17.**  $^{13}\text{C}\{^1\text{H}\}$  NMR spectrum of  $\text{Sm}-(S,S)\text{Zn}$  (100 MHz,  $\text{C}_6\text{D}_6$ ,  $25\text{ }^\circ\text{C}$ ).

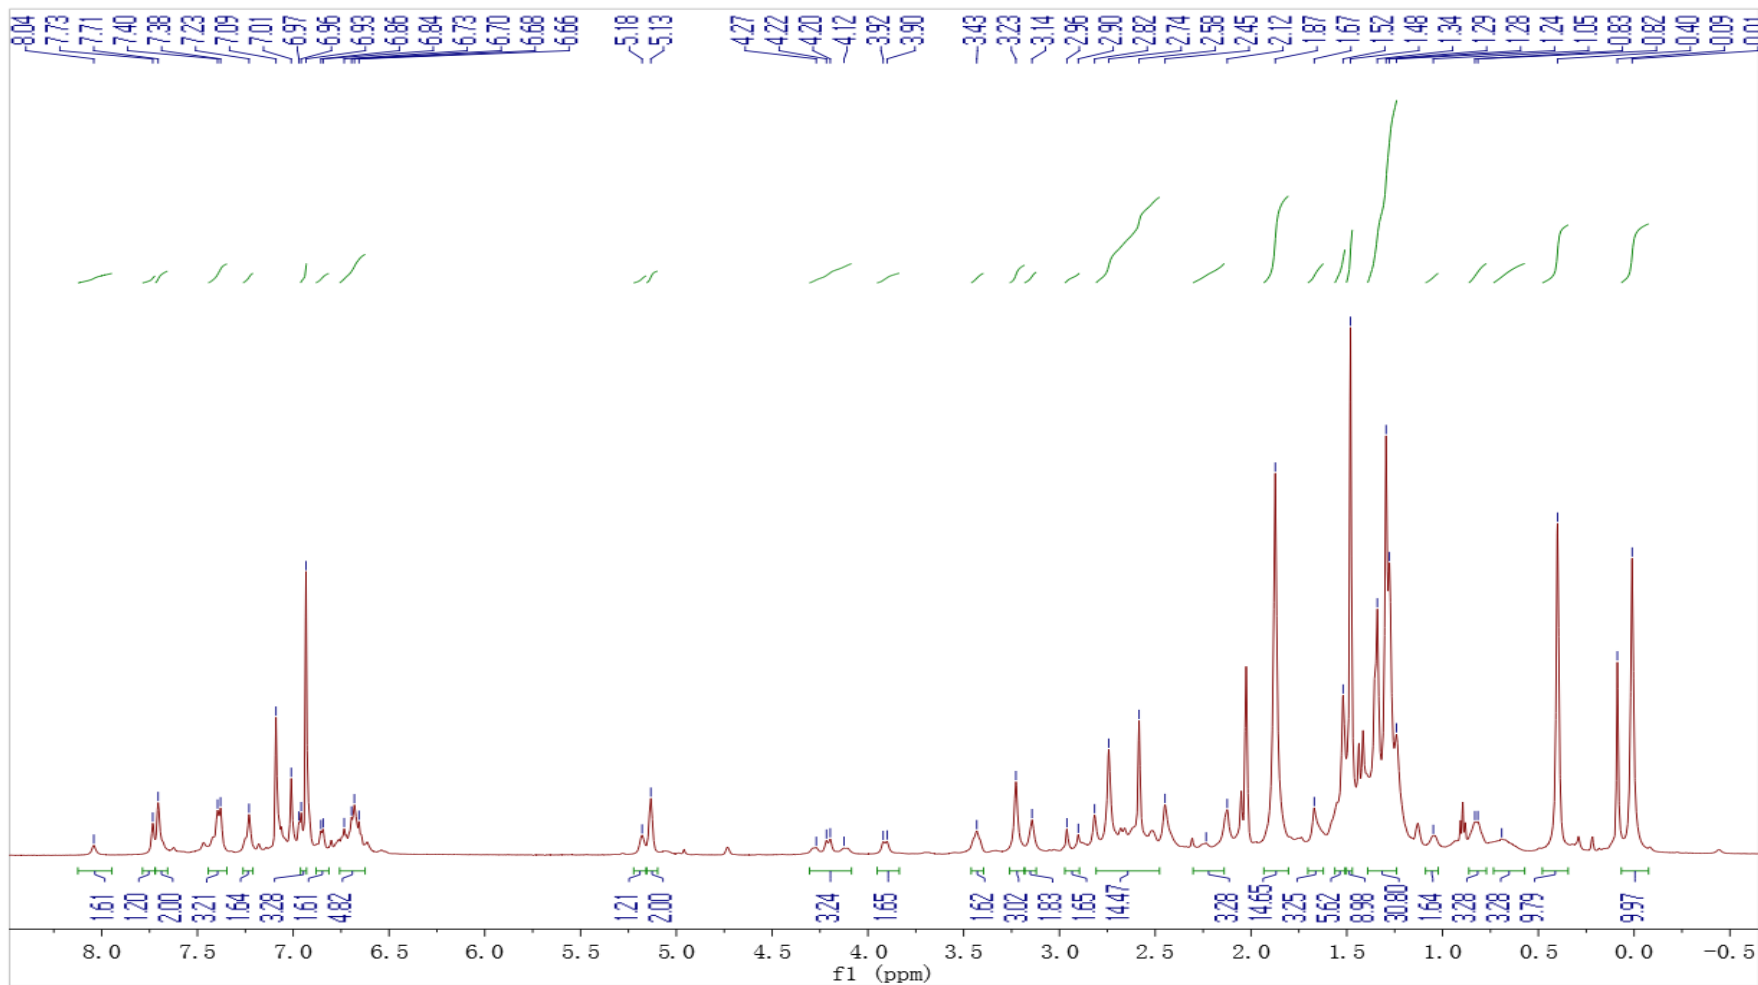

**Figure S18.**  $^1\text{H}$  NMR spectrum of La-(*R,R*)Zn (600 MHz, toluene- $d_8$ ,  $-60\text{ }^\circ\text{C}$ )

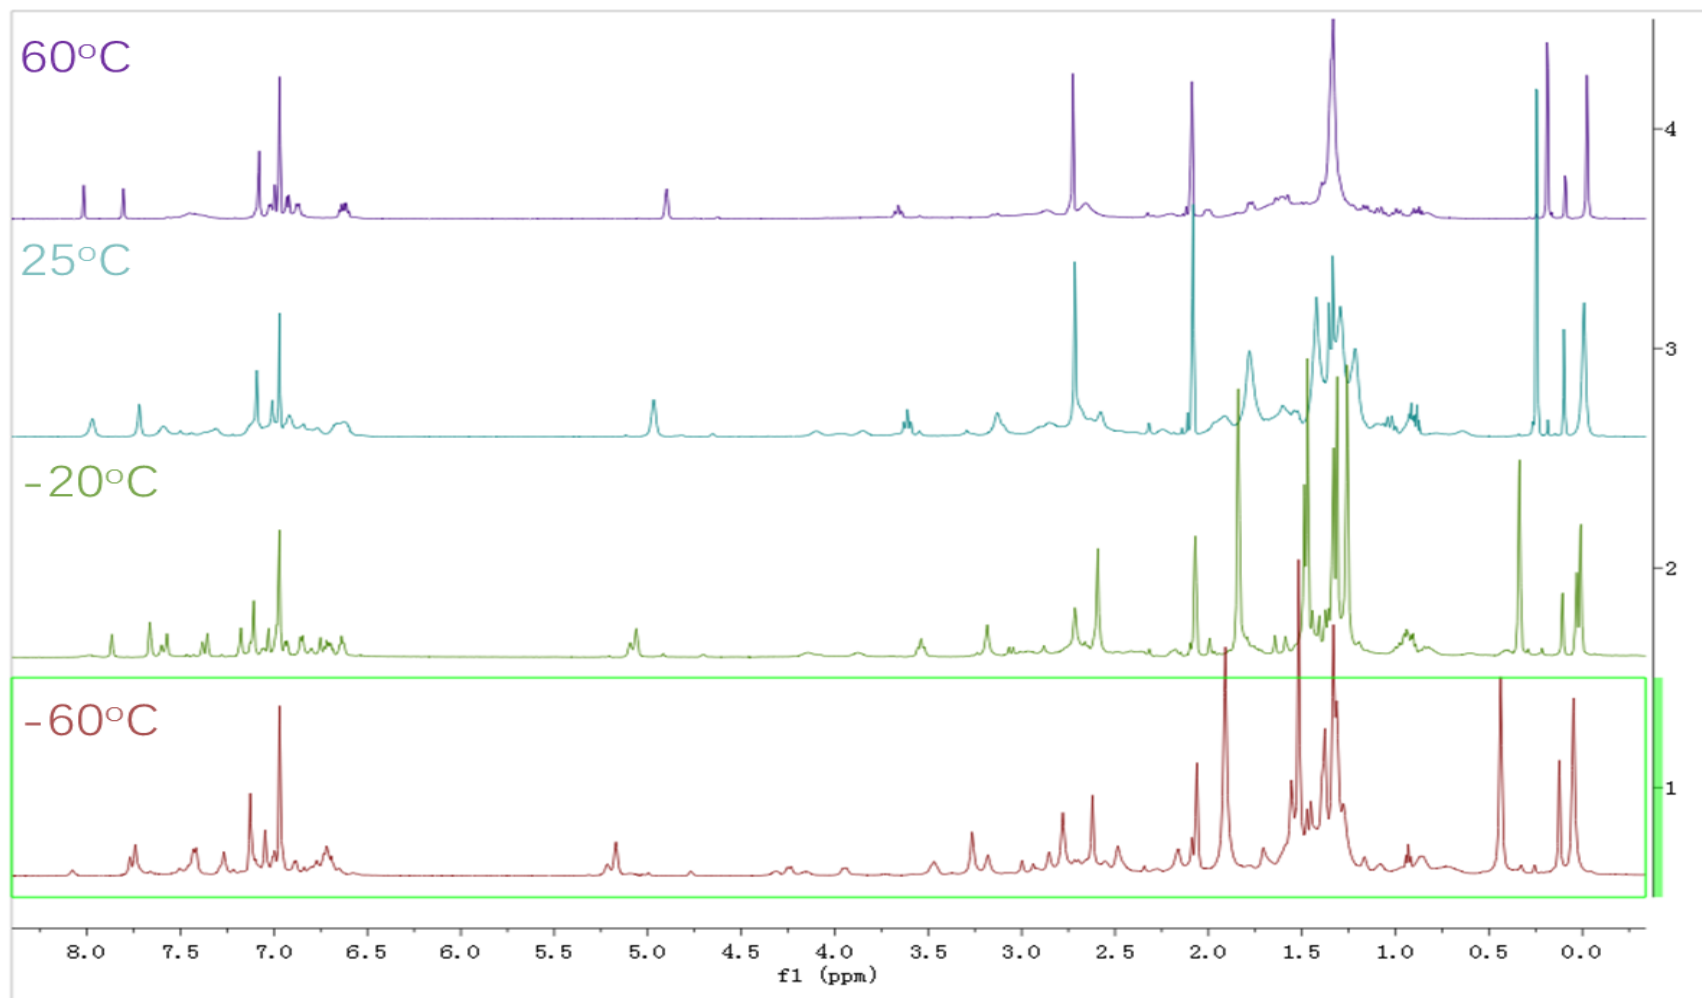

**Figure S19.** Variable temperature <sup>1</sup>H NMR spectra of La-(*R,R*)Zn (600 MHz, toluene-*d*<sub>8</sub>)

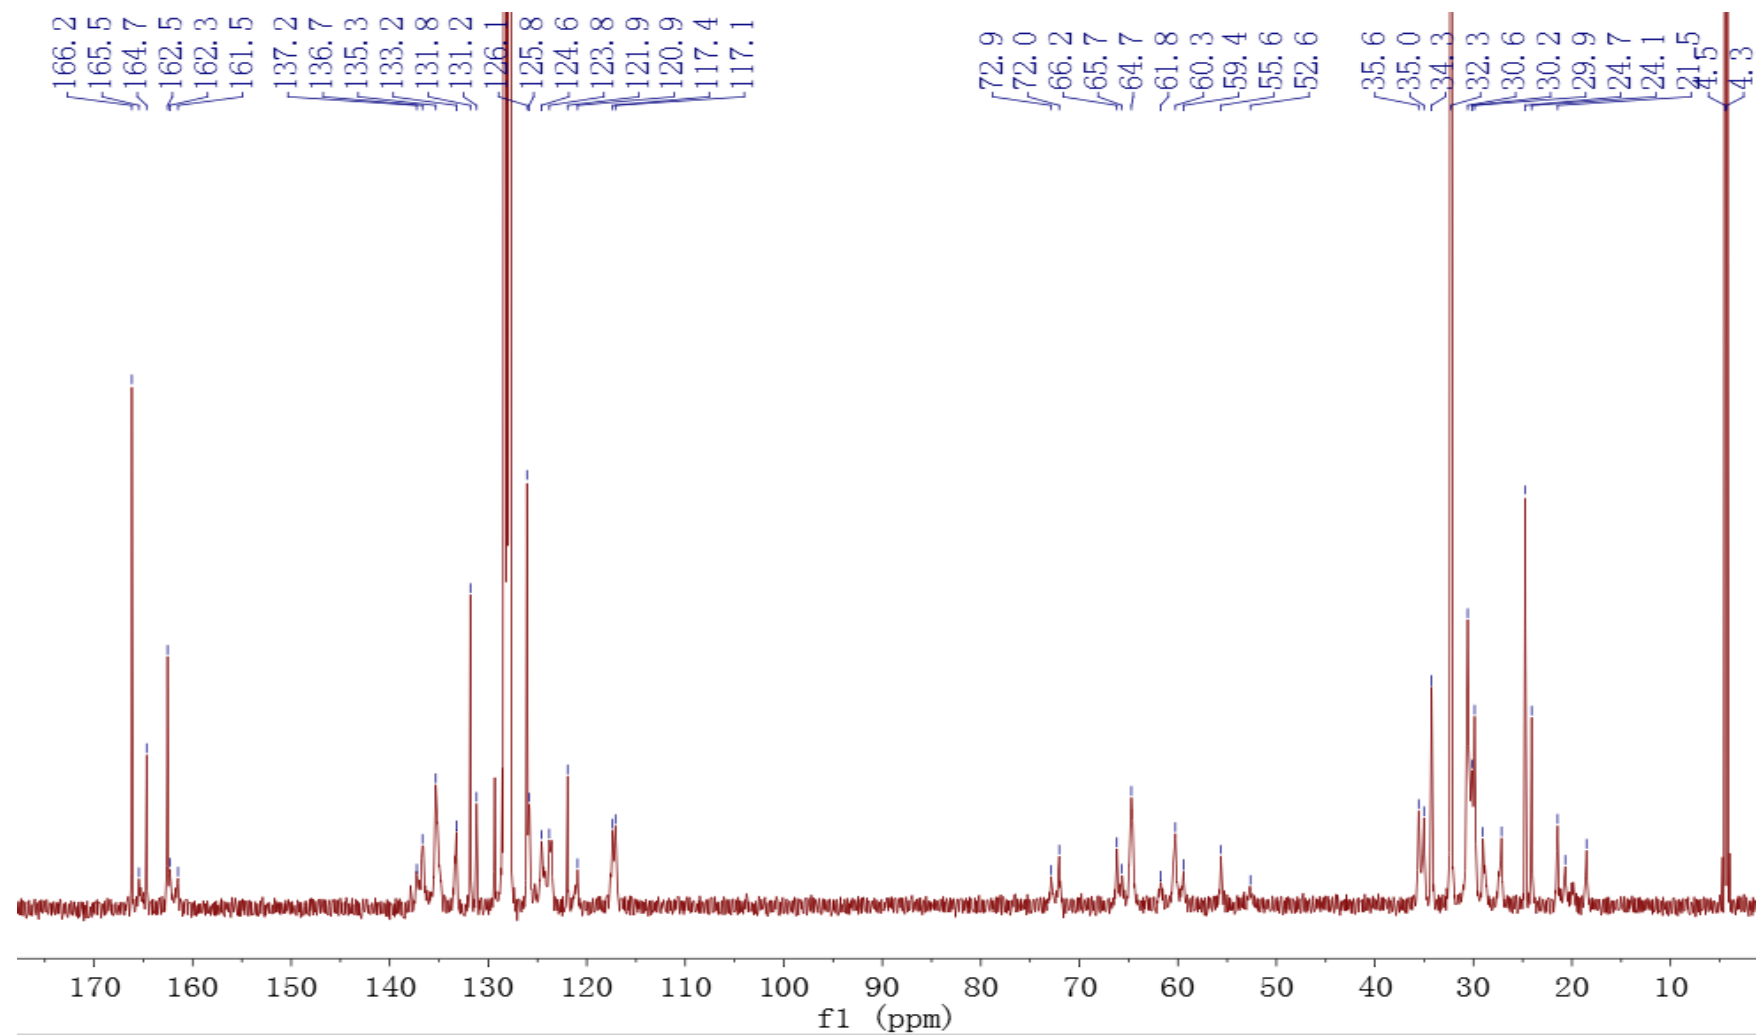

**Figure S20.**  $^{13}\text{C}\{^1\text{H}\}$  NMR spectrum of La-(*R,R*)Zn (100 MHz,  $\text{C}_6\text{D}_6$ , 25 °C).

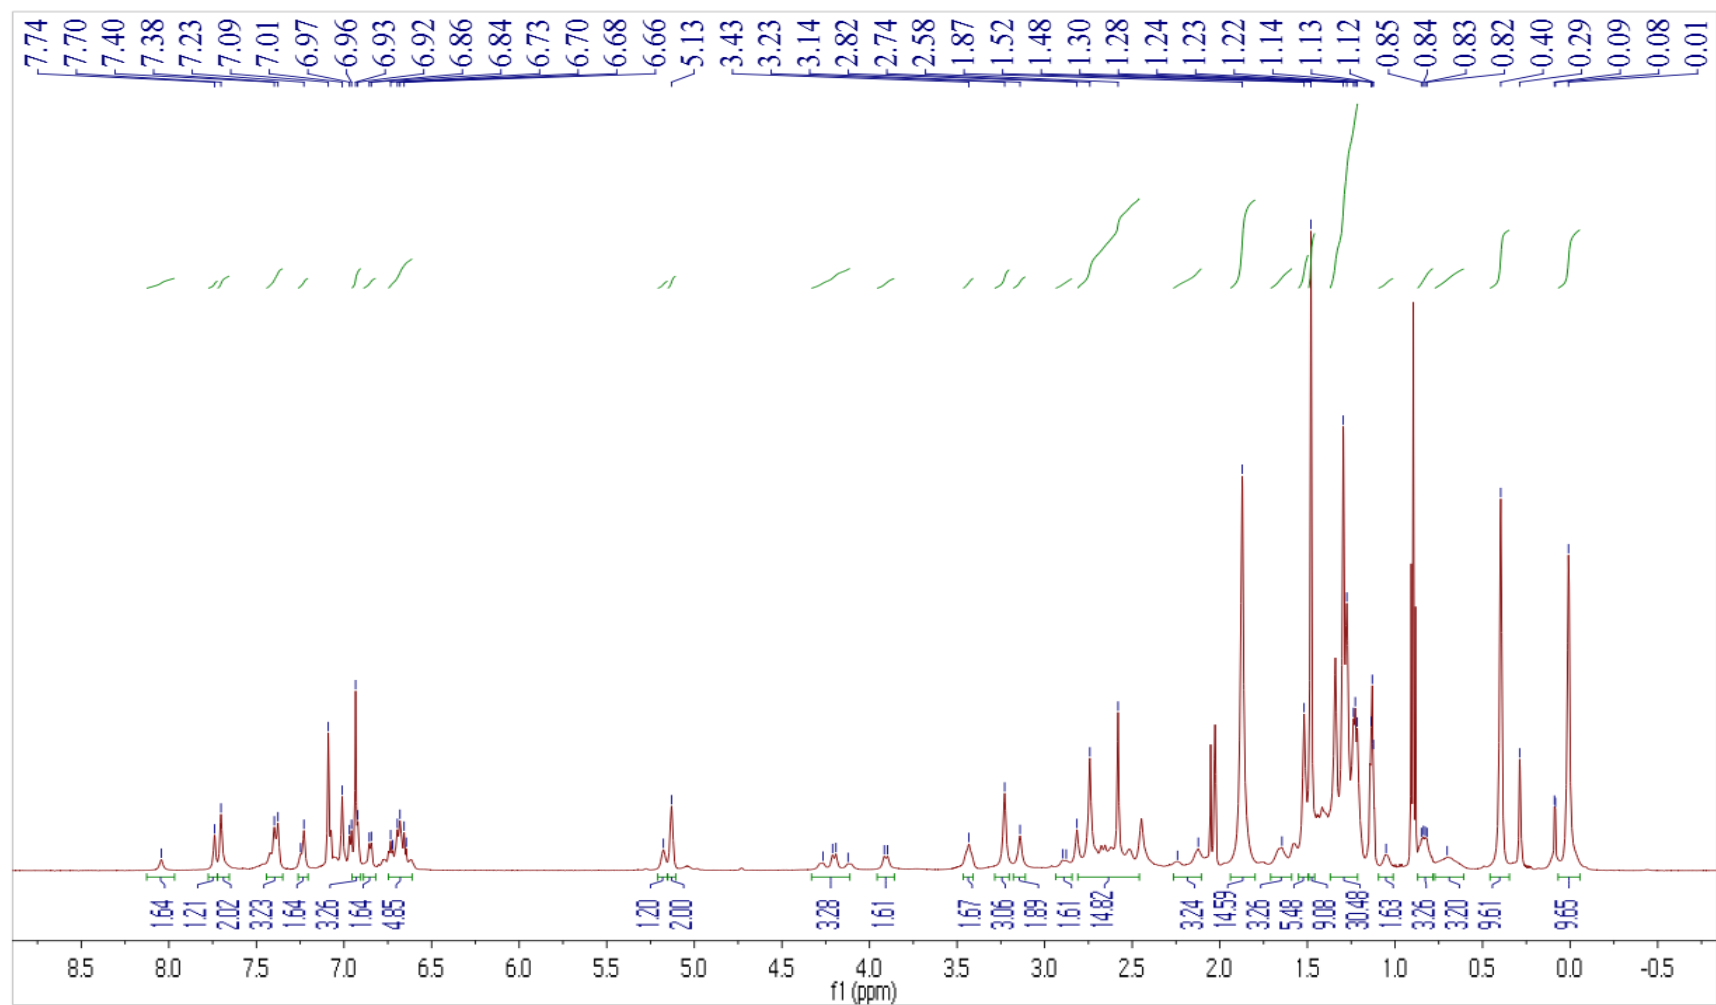

**Figure S21.**  $^1\text{H}$  NMR spectrum of La-(*S,S*)Zn (600 MHz, toluene- $d_8$ , -60 °C).

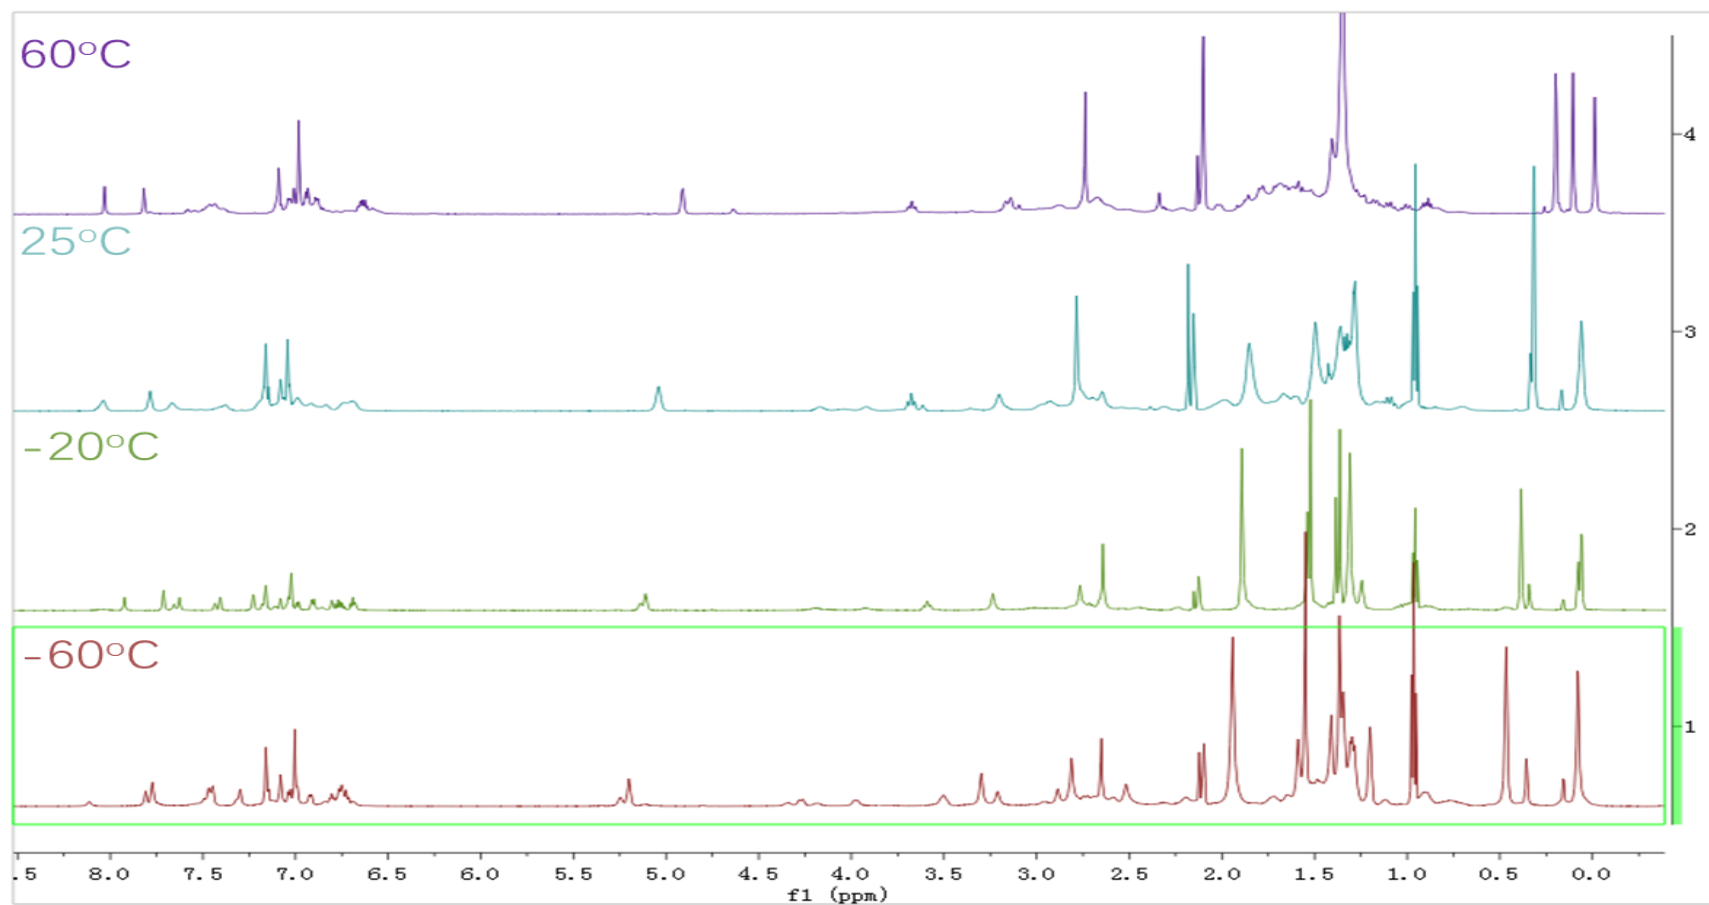

**Figure S22.** Variable temperature <sup>1</sup>H NMR spectrum of La-(*S,S*)Zn, (600 MHz, toluene-*d*<sub>8</sub>. From the bottom to the top: 60, 25, -20, -60 °C)

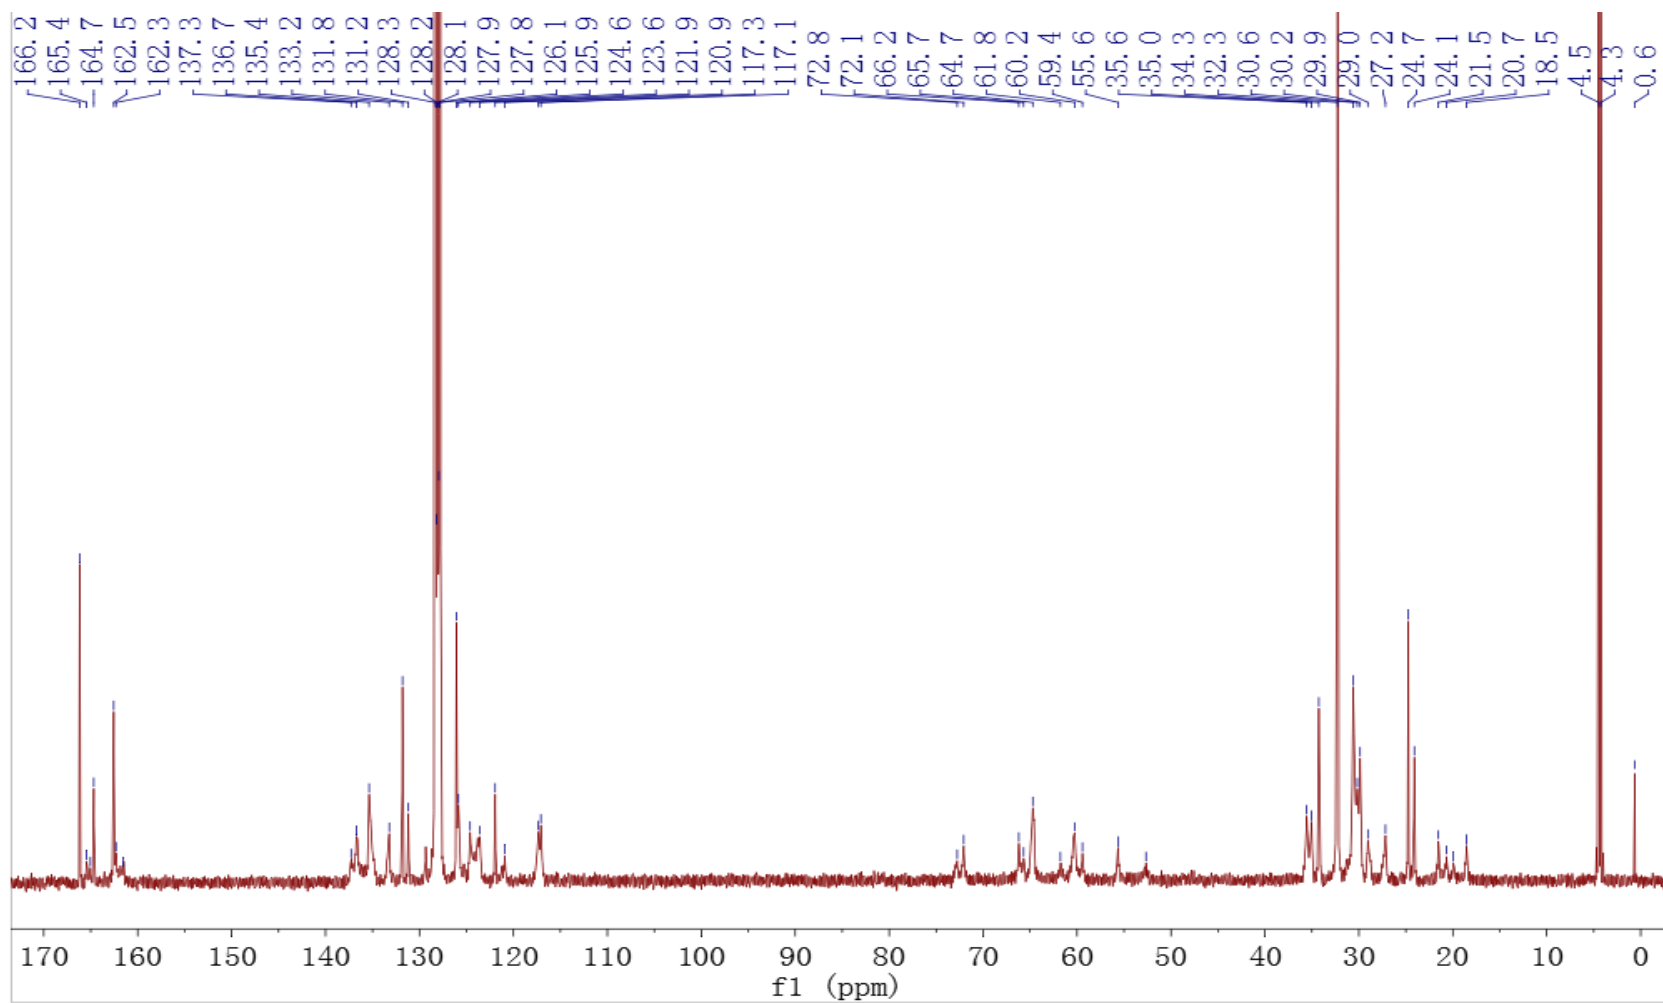

**Figure S23.**  $^{13}\text{C}\{^1\text{H}\}$  NMR spectrum of La-(*S,S*)Zn (100 MHz,  $\text{C}_6\text{D}_6$ , 25 °C).



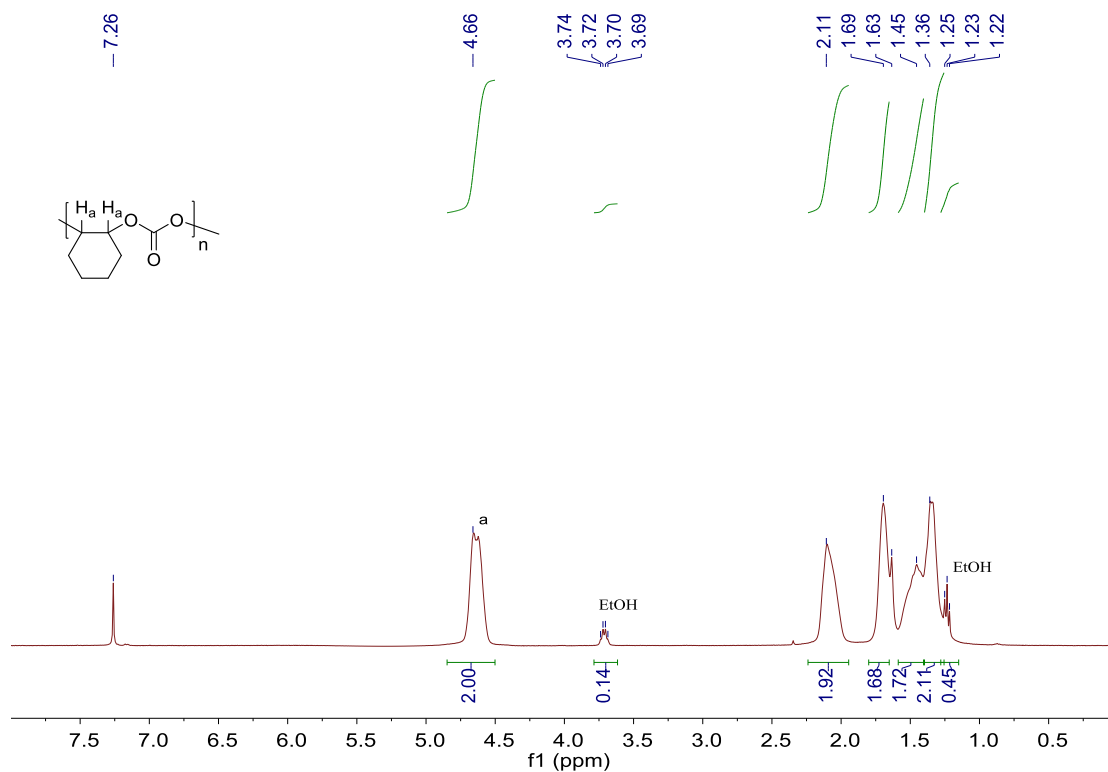

**Figure S24** <sup>1</sup>H NMR spectra of the poly(cyclohexene carbonate) (Table 1, entry 10) (400 MHz, CDCl<sub>3</sub>, 25 °C).

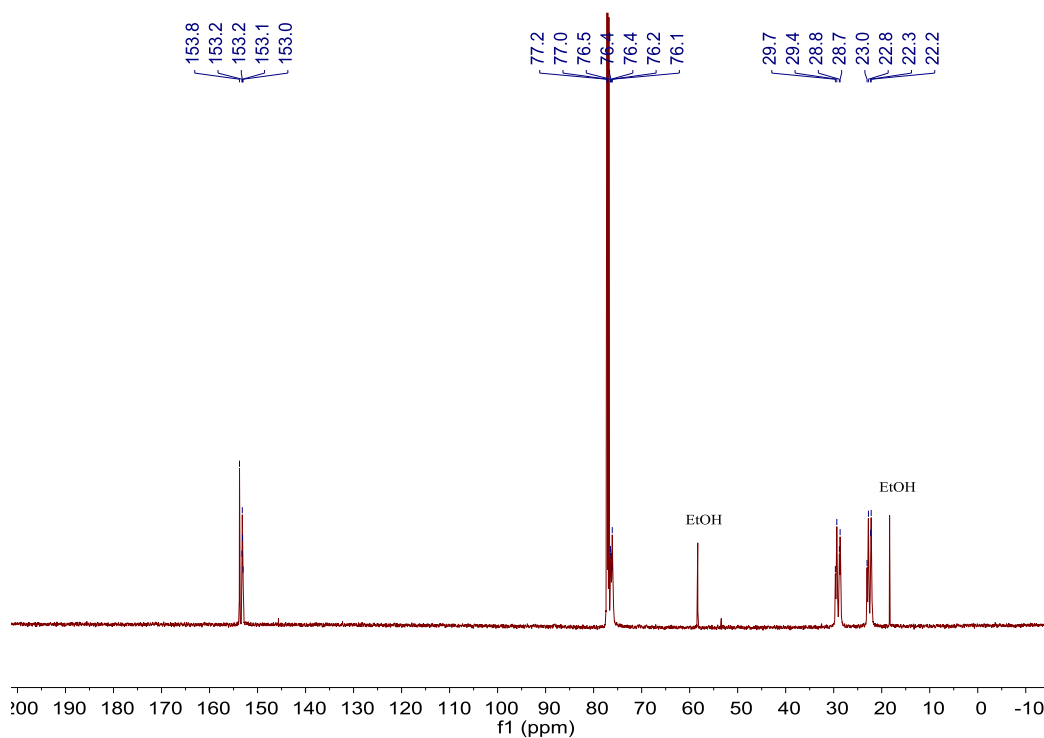

**Figure S25** <sup>13</sup>C{<sup>1</sup>H} NMR spectrum of the poly(cyclohexene carbonate) (Table 1, entry 10) (400 MHz, CDCl<sub>3</sub>, 25 °C).

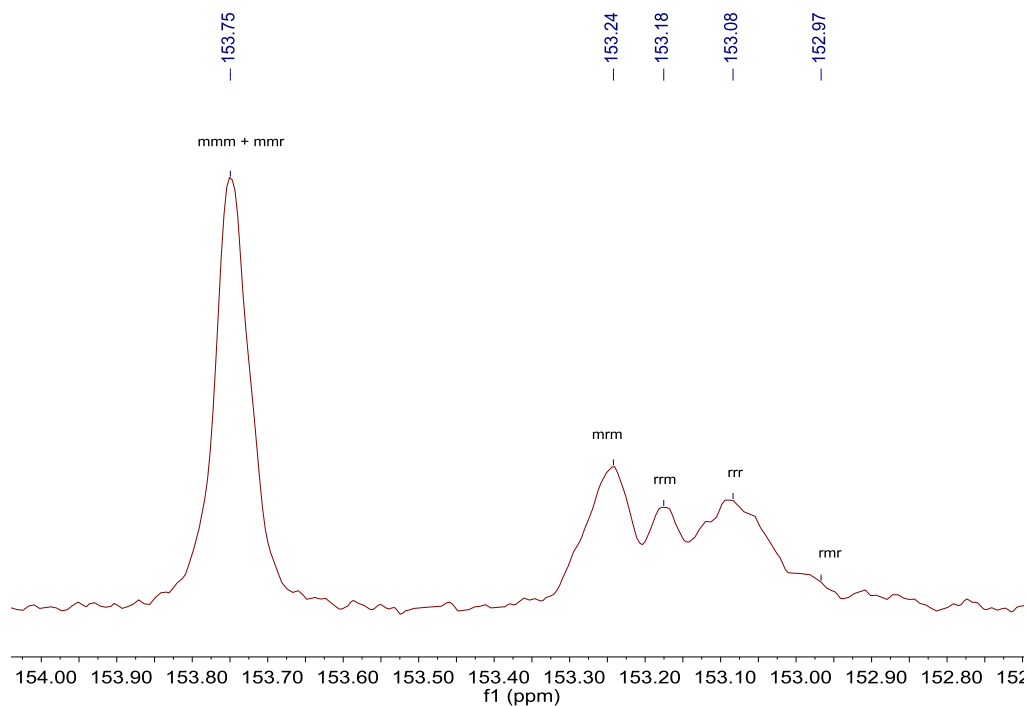

**Figure S26**  $^{13}\text{C}\{^1\text{H}\}$  NMR spectrum of the poly(cyclohexene carbonate) (Table 1, entry 10) (400 MHz,  $\text{CDCl}_3$ , 25 °C). The spectrum shows only the carbonyl region. Peaks were assigned based on previously reported literature values.<sup>1</sup>

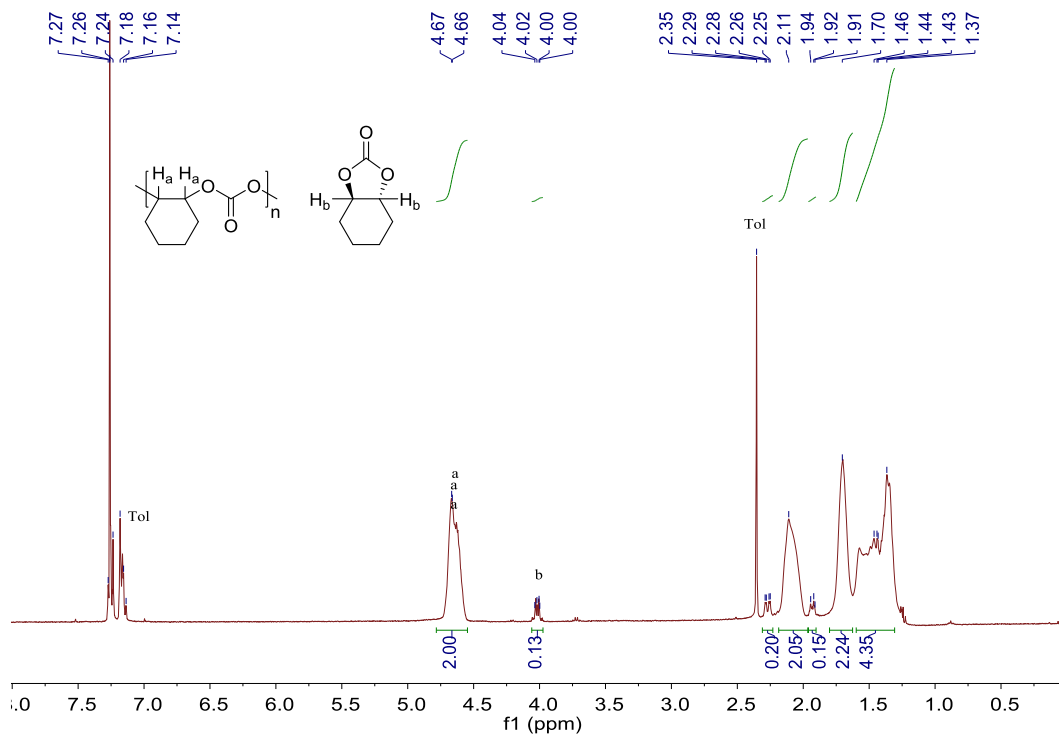

**Figure S27**  $^1\text{H}$  NMR spectra of the poly(cyclohexene carbonate) and cyclic carbonate (Table 1, entry 17) (400 MHz,  $\text{CDCl}_3$ , 25 °C).

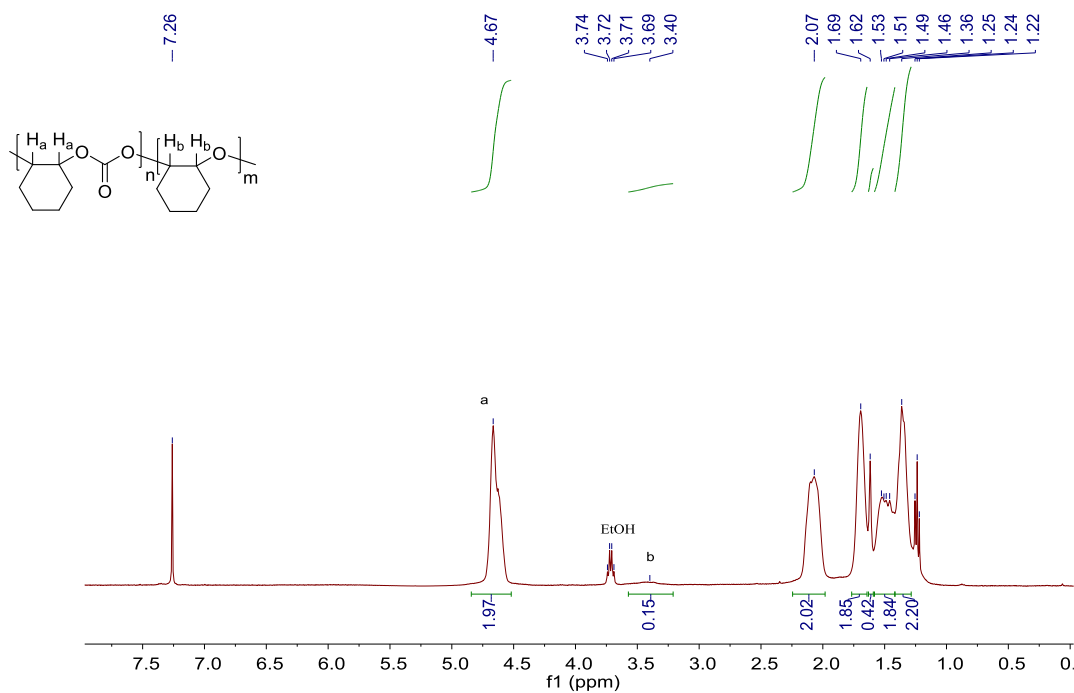

**Figure S28**  $^1\text{H}$  NMR spectra of the poly(cyclohexene carbonate) and polyether (Table 1, entry 1) (400 MHz,  $\text{CDCl}_3$ , 25  $^\circ\text{C}$ ).

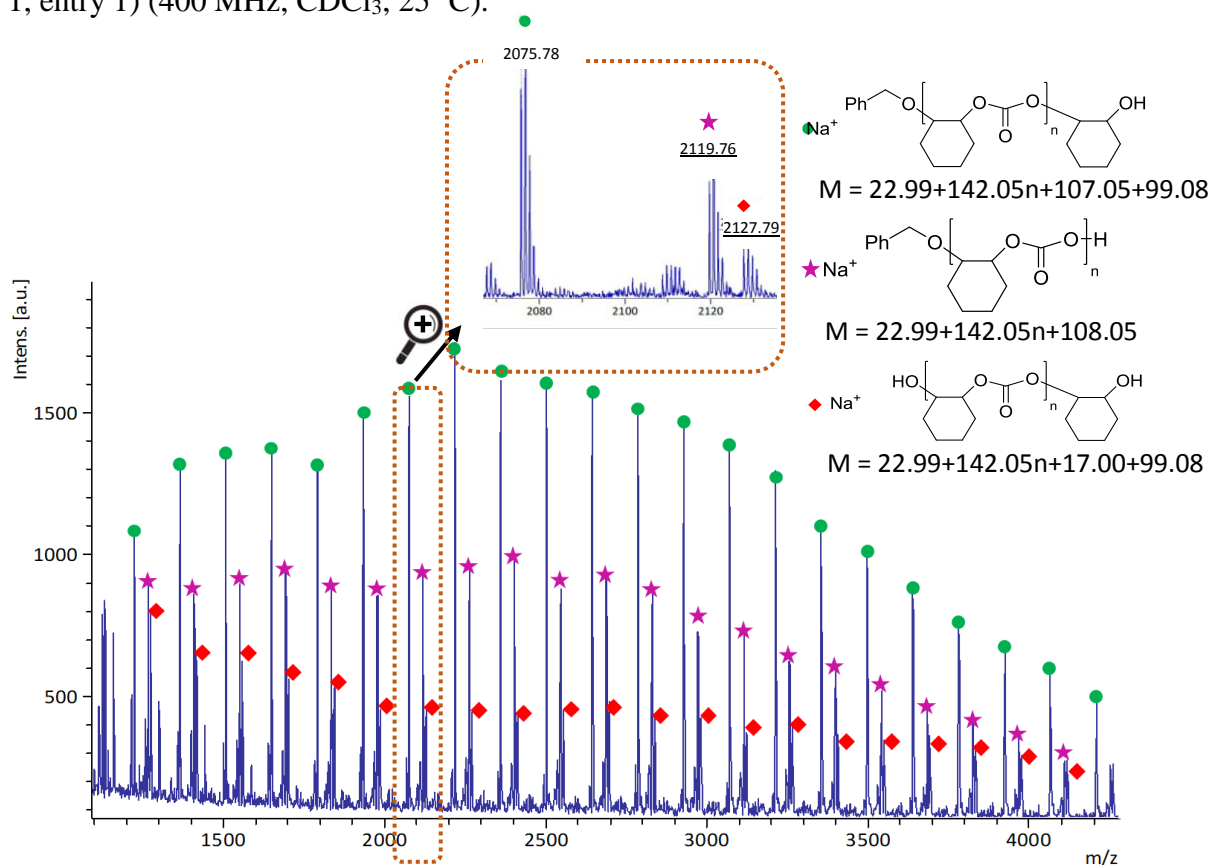

**Figure S29** MALDI-TOF mass spectrum of the resultant oligomer. Conditions:  $V_{\text{tot}} = 0.5$  mL,  $V_{\text{CHO}} = 1$  mL,  $[\text{M}]_0/[\text{C}]_0/[\text{BnOH}] = 500: 1: 1$ ,  $T = 70$   $^\circ\text{C}$ ,  $P_{\text{CO}_2} = 1$  bar, 12 h.

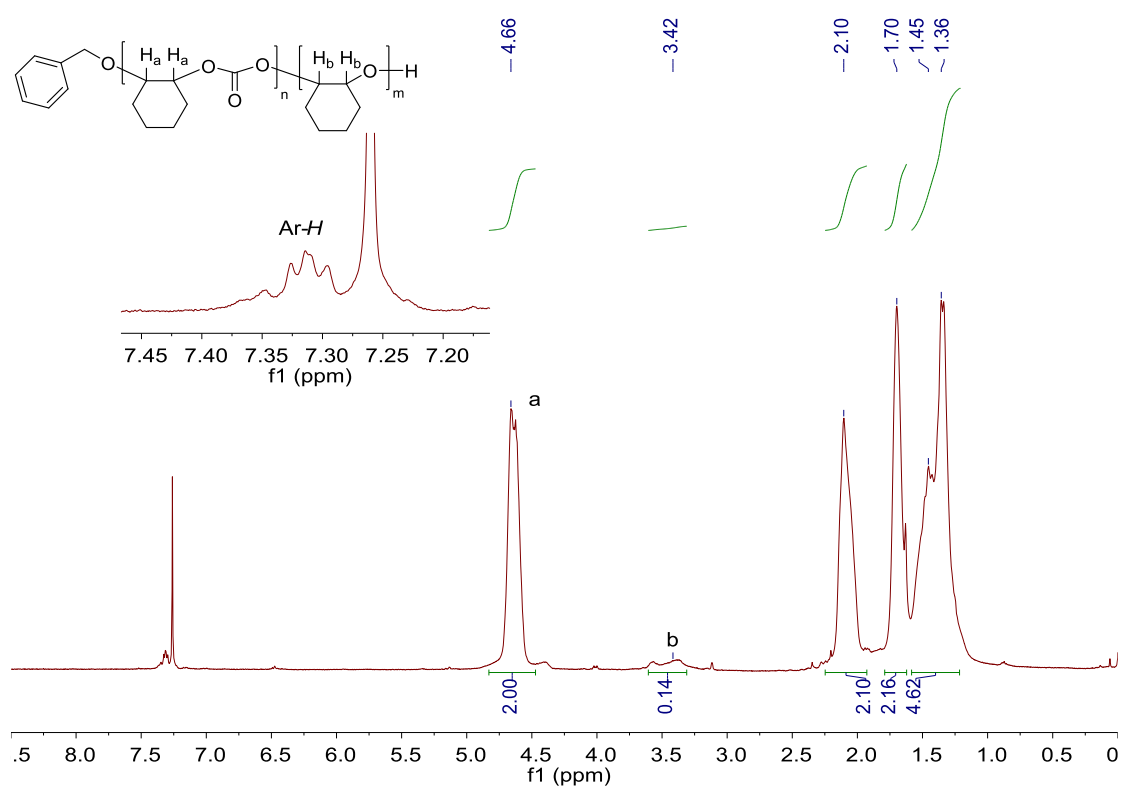

**Figure S30**  $^1\text{H}$  NMR spectra of the poly(cyclohexene carbonate) and polyether (400 MHz,  $\text{CDCl}_3$ , 298K) Conditions:  $V_{\text{tot}} = 0.5$  mL,  $V_{\text{CHO}} = 1$  mL,  $[\text{M}]_0/[\text{C}]_0/[\text{BnOH}] = 500: 1: 1$ ,  $T = 70$  °C,  $P_{\text{CO}_2} = 1$  bar, 12 h.

## References

1. S. Ghosh, D. Pahovnik, U. Kragl and E. Mejía, *Macromolecules*, 2018, **51**, 846–852.
